# Supplementary material for: How does occupational physical activity influence health? An umbrella review of 23 health outcomes across 158 observational studies
Source: HighWire-hosted journal article supplement (doi:10.1136/bjsports-2020-102587), 2020-11-25
Supplement: bjsports-2020-102587supp001_data_supplement.pdf [file bjsports-2020-102587supp001_data_supplement.pdf]

## Supplementary material 1. Search strategies.

Search strategy in PubMed (read from bottom-up).

| No. | Query                                                                                                                                                                                                                                                                                                                                                                                                                                                                                                                                                                                                                                                                                                                                                                                                                                                                                                                                                                                                                                                                                                                                                                                            | Items found |
|-----|--------------------------------------------------------------------------------------------------------------------------------------------------------------------------------------------------------------------------------------------------------------------------------------------------------------------------------------------------------------------------------------------------------------------------------------------------------------------------------------------------------------------------------------------------------------------------------------------------------------------------------------------------------------------------------------------------------------------------------------------------------------------------------------------------------------------------------------------------------------------------------------------------------------------------------------------------------------------------------------------------------------------------------------------------------------------------------------------------------------------------------------------------------------------------------------------------|-------------|
| #3  | #1 AND #2                                                                                                                                                                                                                                                                                                                                                                                                                                                                                                                                                                                                                                                                                                                                                                                                                                                                                                                                                                                                                                                                                                                                                                                        | 114         |
| #2  | (systematic[sb] OR meta-analysis[pt] OR "systematic review"[tiab] OR "systematic literature review"[tiab] OR metaanalysis[tiab] OR "meta analysis"[tiab] OR metanalyses[tiab] OR "meta analyses"[tiab] OR "meta-analyses"[tiab] OR "pooled analysis"[tiab] OR "pooled analyses"[tiab] OR "pooled data"[tiab])                                                                                                                                                                                                                                                                                                                                                                                                                                                                                                                                                                                                                                                                                                                                                                                                                                                                                    | 276539      |
| #1  | ("occupational physical activity"[tiab] OR "Occupational physical activity"[tiab] OR "work-related physical activity"[tiab] OR "Work-related physical activity"[tiab] OR "occupation-related physical activity"[tiab] OR "Occupation-related physical activity"[tiab] OR "work-time physical activity"[tiab] OR "Work-time physical activity"[tiab] OR "work physical activity"[tiab] OR "Work physical activity"[tiab] OR "Occupational energy expenditure"[tiab] OR "occupational energy expenditure"[tiab] OR "work-related energy expenditure"[tiab] OR "Work-related energy expenditure"[tiab] OR "domain-specific physical activity"[tiab] OR "domains of physical activity"[tiab] OR "physical activity domains"[tiab] OR "domain-related physical activity"[tiab] OR "work-related physical activity domain"[tiab] OR "occupational activity" [tiab] OR "physical workload" [tiab] OR "occupational load" [tiab] OR "heavy workload" [tiab] OR "heavy work" [tiab] OR "heavy labor" [tiab] OR "heavy labour" [tiab] OR "physical labor" [tiab] OR "physical labour" [tiab] OR "occupational activities" [tiab] OR "physical demanding occupations" [tiab] OR "occupational load" [tiab]) | 4146        |

Search strategy in Web of Science (Databases= WOS, KJD, MEDLINE, RSCI, SCIELO Timespan=All years)

| No. | Query                                                                                                                                                                                                                                                                                                                                                                                                                                                                                                                                                                                                                                                                                                                                                                                                                                                                                                          | Item found |
|-----|----------------------------------------------------------------------------------------------------------------------------------------------------------------------------------------------------------------------------------------------------------------------------------------------------------------------------------------------------------------------------------------------------------------------------------------------------------------------------------------------------------------------------------------------------------------------------------------------------------------------------------------------------------------------------------------------------------------------------------------------------------------------------------------------------------------------------------------------------------------------------------------------------------------|------------|
| #3  | #1 AND #2                                                                                                                                                                                                                                                                                                                                                                                                                                                                                                                                                                                                                                                                                                                                                                                                                                                                                                      | 158        |
| #2  | TS=(systematic review OR meta-analysis OR "systematic review" OR "systematic literature review" OR "meta-analysis" OR "meta analysis" OR "meta-analyses" OR "meta analyses" OR "pooled analysis" OR "pooled analyses" OR "pooled data")                                                                                                                                                                                                                                                                                                                                                                                                                                                                                                                                                                                                                                                                        | 435971     |
| #1  | TS=("physical workload" OR "occupational activity" OR "occupational activities" OR "physical labor" OR "physical labour" OR "physical demanding occupation" OR "occupational physical activity" OR "Occupational physical activity" OR "work-related physical activity" OR "Work-related physical activity" OR "occupation-related physical activity" OR "Occupation-related physical activity" OR "work-time physical activity" OR "Work-time physical activity" OR "work physical activity" OR "Work physical activity" OR "Occupational energy expenditure" OR "occupational energy expenditure" OR "work-related energy expenditure" OR "Work-related energy expenditure" OR "domain-specific physical activity" OR "domains of physical activity" OR "physical activity domains" OR "domain-related physical activity" OR "work-related physical activity domain" OR "heavy work" OR "occupational load") | 5.728      |

Search strategy in Embase (read from bottom-up).

| No. | Query                                                                                                                                                                                                                                                                                                                                                                                                                                                                                                                                                                                                                                                                                                                            | Items found |
|-----|----------------------------------------------------------------------------------------------------------------------------------------------------------------------------------------------------------------------------------------------------------------------------------------------------------------------------------------------------------------------------------------------------------------------------------------------------------------------------------------------------------------------------------------------------------------------------------------------------------------------------------------------------------------------------------------------------------------------------------|-------------|
| #2  | ('physical workload' OR 'occupational activity' OR 'occupational activities' OR 'physical labor' OR 'physical labour' OR 'physical demanding occupation' OR 'occupational physical activity' OR 'work-related physical activity' OR 'occupation-related physical activity' OR 'work-time physical activity' OR 'work physical activity' OR 'occupational energy expenditure' OR 'work-related energy expenditure' OR 'domain-specific physical activity' OR 'domains of physical activity' OR 'physical activity domains' OR 'domain-related physical activity' OR 'work-related physical activity domain' OR 'heavy work' OR 'occupational load') AND ([cochrane review]/lim OR [systematic review]/lim OR [meta analysis]/lim) | 104         |
| #1  | 'physical workload' OR 'occupational activity' OR 'occupational activities' OR 'physical labor' OR 'physical labour' OR 'physical demanding occupation' OR 'occupational physical                                                                                                                                                                                                                                                                                                                                                                                                                                                                                                                                                | 4756        |

|  |                                                                                                                                                                                                                                                                                                                                                                                                                                                                |  |
|--|----------------------------------------------------------------------------------------------------------------------------------------------------------------------------------------------------------------------------------------------------------------------------------------------------------------------------------------------------------------------------------------------------------------------------------------------------------------|--|
|  | activity' OR 'work-related physical activity' OR 'occupation-related physical activity' OR 'work-time physical activity' OR 'work physical activity' OR 'occupational energy expenditure' OR 'work-related energy expenditure' OR 'domain-specific physical activity' OR 'domains of physical activity' OR 'physical activity domains' OR 'domain-related physical activity' OR 'work-related physical activity domain' OR 'heavy work' OR 'occupational load' |  |
|--|----------------------------------------------------------------------------------------------------------------------------------------------------------------------------------------------------------------------------------------------------------------------------------------------------------------------------------------------------------------------------------------------------------------------------------------------------------------|--|

## Search strategy in SportDiscus

| No. | Query                                                                                                                                                                                                                                                                                                                                                                                                                                                                                                                                                                                                                                                                                                                                                                                                                                                                                             | Items found |
|-----|---------------------------------------------------------------------------------------------------------------------------------------------------------------------------------------------------------------------------------------------------------------------------------------------------------------------------------------------------------------------------------------------------------------------------------------------------------------------------------------------------------------------------------------------------------------------------------------------------------------------------------------------------------------------------------------------------------------------------------------------------------------------------------------------------------------------------------------------------------------------------------------------------|-------------|
| #2  | ('physical workload' OR 'occupational activity' OR 'occupational activities' OR 'physical labor' OR 'physical labour' OR 'physical demanding occupation' OR 'occupational physical activity' OR 'work-related physical activity' OR 'occupation-related physical activity' OR 'work-time physical activity' OR 'work physical activity' OR 'occupational energy expenditure' OR 'work-related energy expenditure' OR 'domain-specific physical activity' OR 'domains of physical activity' OR 'physical activity domains' OR 'domain-related physical activity' OR 'work-related physical activity domain' OR 'heavy work' OR 'occupational load' ) AND ( =(systematic review OR meta-analysis OR "systematic review" OR "systematic literature review" OR "meta-analysis" OR "meta analysis" OR "meta-analyses" OR "meta analyses" OR "pooled analysis" OR "po OR "pooled data")oled analyses" ) | 68          |
| #1  | ('physical workload' OR 'occupational activity' OR 'occupational activities' OR 'physical labor' OR 'physical labour' OR 'physical demanding occupation' OR 'occupational physical activity' OR 'work-related physical activity' OR 'occupation-related physical activity' OR 'work-time physical activity' OR 'work physical activity' OR 'occupational energy expenditure' OR 'work-related energy expenditure' OR 'domain-specific physical activity' OR 'domains of physical activity' OR 'physical activity domains' OR 'domain-related physical activity' OR 'work-related physical activity domain' OR 'heavy work' OR 'occupational load' )                                                                                                                                                                                                                                               | 1.911       |

## Search strategy in CINAHL (read from bottom-up).

| No. | Query                                                                                                                                                                                                                                                                                                                                                                                                                                                                                                                                                                                                                                                                                                                                            | Items found |
|-----|--------------------------------------------------------------------------------------------------------------------------------------------------------------------------------------------------------------------------------------------------------------------------------------------------------------------------------------------------------------------------------------------------------------------------------------------------------------------------------------------------------------------------------------------------------------------------------------------------------------------------------------------------------------------------------------------------------------------------------------------------|-------------|
| #3  | #1 AND #2                                                                                                                                                                                                                                                                                                                                                                                                                                                                                                                                                                                                                                                                                                                                        | 122         |
| #2  | ( cochrane review OR "systematic review" OR meta analysis ) Published Date: -20191231                                                                                                                                                                                                                                                                                                                                                                                                                                                                                                                                                                                                                                                            | 175.427     |
| #1  | ('physical workload' OR 'occupational activity' OR 'occupational activities' OR 'physical labor' OR 'physical labour' OR 'physical demanding occupation' OR 'occupational physical activity' OR 'work-related physical activity' OR 'occupation-related physical activity' OR 'work-time physical activity' OR 'work physical activity' OR 'occupational energy expenditure' OR 'work-related energy expenditure' OR 'domain-specific physical activity' OR 'domains of physical activity' OR 'physical activity domains' OR 'domain-related physical activity' OR 'work-related physical activity domain' OR 'heavy work' OR 'occupational load' ) AND TI ( cochrane review OR "systematic review" OR meta analysis ) Published Date: -20191231 | 4859        |
