# Supplementary material for: How does occupational physical activity influence health? An umbrella review of 23 health outcomes across 158 observational studies
Source: HighWire-hosted journal article supplement (doi:10.1136/bjsports-2020-102587), 2020-11-25
Supplement: bjsports-2020-102587supp002_data_supplement.pdf [file bjsports-2020-102587supp002_data_supplement.pdf]

## Supplementary material 2: Health-related outcomes addressed by WHO

The WHO Guideline Development Group decided on the scope of their guidelines to use PICO (Population-Intervention-Control-Outcome) questions.

**Population:** Adults (18-64years), Working population

**Exposure:** Greater volume, duration, frequency or intensity of Occupational Physical Activity.

**Comparison:** No Occupational Physical Activity or a lesser volume, duration, frequency or intensity.

| Outcomes                                 | Importance |
|------------------------------------------|------------|
| All cause of mortality                   | Critical   |
| Cardio Vascular Disease                  | Critical   |
| Cancer                                   | Critical   |
| Diabetes type 2                          | Critical   |
| Osteoarthritis                           | Critical   |
| Adiposity/Prevention of weight gain      | Critical   |
| Cognitive outcomes (dementia, cognition) | Critical   |
| Mental Health problems                   | Critical   |
| Health Related quality of life           | Important  |
| Hypertension                             | Important  |
| Sleep duration and quality               | Important  |
