# Supplementary material for: How does occupational physical activity influence health? An umbrella review of 23 health outcomes across 158 observational studies
Source: HighWire-hosted journal article supplement (doi:10.1136/bjsports-2020-102587), 2020-11-25
Supplement: bjsports-2020-102587supp004_data_supplement.pdf [file bjsports-2020-102587supp004_data_supplement.pdf]

## Supplementary material 4: Reason for exclusion after full text screening.

|    | <b>Reference (first author, year and title)</b>                                                                                                                                                                                                     | <b>Reason</b>                                                                             |
|----|-----------------------------------------------------------------------------------------------------------------------------------------------------------------------------------------------------------------------------------------------------|-------------------------------------------------------------------------------------------|
| 1  | 1 Kyu. H.H. et al. 2016. Physical activity and the risk of breast cancer, colon cancer, diabetes, ischemic heart disease, and ischemic stroke events: Systematic review and dose-response meta-analysis for the Global Burden of Disease Study 2013 | No separate measurement of OPA.                                                           |
| 2  | 2 Wahid et al. 2015. Quantifying the association between physical activity and cardiovascular disease: A meta-analysis                                                                                                                              | No separate measurement of OPA                                                            |
| 3  | 3 Morgan et al. 2012. Physical activity in middle-age and dementia in later life: findings from a prospective cohort of men in Caerphilly, South Wales and a meta-analysis                                                                          | No separate measurement of OPA                                                            |
| 4  | 4 Dieker et al 2019. The contribution of work and lifestyle factors to socioeconomic inequalities in self-rated health – a systematic review                                                                                                        | No separate measurement of OPA.                                                           |
| 5  | 1 Ma Peng et al. 2017. Daily sedentary time and its association with risk for colorectal cancer in adults A dose-response meta-analysis of prospective cohort studies                                                                               | Study is not about OPA                                                                    |
| 6  | 2 Stamatakis et al. 2013 Are sitting occupations associated with increased all-cause, cancer, and cardiovascular disease mortality risk? A pooled analysis of seven British population cohorts                                                      | Study is not about OPA                                                                    |
| 7  | 1 Theorell et al. 2016. A systematic review of studies in the contributions of the work environment to ischaemic heart disease development                                                                                                          | It is not possible to determine if there is any association between exposure and outcome. |
| 8  | 1 Abioye et al. 2015. Physical activity and risk of gastric cancer: a meta-analysis of observational studies                                                                                                                                        | Included only one study about OPA.                                                        |
| 9  | 2 Teychenne et al. 2013. Physical Activity, Sedentary Behavior, and Postnatal Depressive Symptoms A Review                                                                                                                                          | Included only one study about OPA.                                                        |
| 10 | 3 Anzuini 2011, Physical activity and cancer prevention: A review of current evidence and biological mechanisms                                                                                                                                     | Included only one study about OPA.                                                        |
| 11 | 1 Kitahara et al. 2012 : Physical activity, diabetes, and thyroid cancer risk: a pooled analysis of five prospective studies                                                                                                                        | No systematic review or meta analyses.                                                    |
| 12 | 2 Cochero. 2008. The effect of income and occupation on body mass index among women in the Cebu Longitudinal Health and Nutrition Surveys (1983-2002)                                                                                               | No systematic review or meta analyses                                                     |
| 13 | 3 Oczkowski, 2005: Complexity of the relation between physical activity and stroke: a meta-analysis                                                                                                                                                 | No systematic review or meta analyses.                                                    |
| 14 | 4 Nordander et al. 2016: Exposure-response relationships for work-related neck and shoulder musculoskeletal disorders - Analyses of pooled uniform data sets                                                                                        | No systematic review or meta analyses.                                                    |

|    |   |                                                                                                                                                                                                                 |                                                                                                                       |
|----|---|-----------------------------------------------------------------------------------------------------------------------------------------------------------------------------------------------------------------|-----------------------------------------------------------------------------------------------------------------------|
| 15 | 5 | Engel, 2018. Work and Female Breast Cancer: The State of the Evidence, 2002-2017                                                                                                                                | No systematic review or meta analyses                                                                                 |
| 16 | 6 | Barengo 2007 Physical activity and hypertension: Evidence of cross-sectional studies, cohort studies and meta-analysis                                                                                          | No systematic review or meta analyses                                                                                 |
| 17 | 7 | Cooper, 1995. Occupational activity and the risk of osteoarthritis                                                                                                                                              | No systematic review or meta analyses                                                                                 |
| 18 | 8 | Bierma-Zeilstra 2007 Risk factors and prognostic factors of hip and knee osteoarthritis                                                                                                                         | No systematic review or meta analyses.                                                                                |
| 19 | 9 | Moore 2010; Physical activity, sedentary behaviours, and the prevention of endometrial cancer                                                                                                                   | No systematic review or meta analyses.                                                                                |
| 20 | 1 | Porru et al 2003 [Bladder cancer and occupational activity]                                                                                                                                                     | Non-English                                                                                                           |
| 21 | 1 | De Zwart et al 1995: Physical workload and the ageing worker: A review of the literature                                                                                                                        | Not on the right outcome <sup>1</sup>                                                                                 |
| 22 | 2 | Boggild et al 1997: Occupational environment and strain induced gout. A review of epidemiological studies of the connection between occupational environment and coxarthrosis                                   | Not on the right outcome <sup>1</sup>                                                                                 |
| 23 | 3 | Hamidou, 2013. Amyotrophic lateral sclerosis, physical activity and sport: A literature review                                                                                                                  | Not on the right outcome <sup>1</sup>                                                                                 |
| 24 | 4 | Lacorte et al. 2014: Physical activity, and physical activity related to sports, leisure and occupational activity as risk factors for ALS: A systematic review                                                 | Not on the right outcome <sup>1</sup>                                                                                 |
| 25 | 5 | Lam et al. 2017: Does physical activity protect against the development of gastroesophageal reflux disease, Barrett's esophagus, and esophageal adenocarcinoma? A review of the literature with a meta-analysis | Not on the right outcome <sup>1</sup>                                                                                 |
| 26 | 6 | Stephen 2017. Physical Activity and Alzheimer's Disease: A Systematic Review                                                                                                                                    | Not on the right outcome <sup>1</sup>                                                                                 |
| 27 | 7 | Svendsen, 2013: Risk and prognosis of inguinal hernia in relation to occupational mechanical exposures - a systematic review of the epidemiologic evidence                                                      | Not on the right outcome <sup>1</sup>                                                                                 |
| 28 | 8 | Togo et al. 2009. Heart Rate Variability in Occupational Health --A Systematic Review                                                                                                                           | Not on the right outcome <sup>1</sup>                                                                                 |
| 29 | 9 | Yang F. 2015. Physical activity and risk of Parkinson's disease in the Swedish National March Cohort                                                                                                            | Not on the right outcome <sup>1</sup>                                                                                 |
| 30 | 1 | Sun, Y. 2019 Hip Osteoarthritis and Physical Workload: Influence of Study Quality on Risk EstimationsA Meta-Analysis of Epidemiological Findings                                                                | focused only on biomechanical (i.e. ergonomic) physical work exposures, rather than (occupational) physical activity; |
| 31 | 2 | Richmond, 2013 Are joint injury, sport activity, physical activity, obesity, or occupational activities predictors for osteoarthritis? A systematic review                                                      | focused only on biomechanical (i.e. ergonomic) physical work exposures, rather than (occupational) physical activity; |
| 32 | 3 | Ezzat, 2012. Occupational activity and the risk of osteoarthritis                                                                                                                                               | focused only on biomechanical (i.e. ergonomic) physical work exposures, rather than (occupational) physical activity; |

33 4 Lievens 2001 Influence of work on the development of osteoarthritis of the hip: a systematic review focused only on biomechanical (i.e. ergonomic) physical work exposures, rather than (occupational) physical activity;

<sup>1</sup>Health-related outcomes addressed by WHO (Supplementary file 2)
