# Supplementary material for: How does occupational physical activity influence health? An umbrella review of 23 health outcomes across 158 observational studies
Source: HighWire-hosted journal article supplement (doi:10.1136/bjsports-2020-102587), 2020-11-25
Supplement: bjsports-2020-102587supp005_data_supplement.pdf [file bjsports-2020-102587supp005_data_supplement.pdf]

## Supplementary material 5: Criterion-specific AMSTAR 2 credibility rating, over-all rating score, overall rating, for each included review.

| Author, Year    | PECO <sup>1</sup> | A-priori Methods <sup>2</sup> | Study Design Selection <sup>3</sup> | Search Strategy <sup>4</sup> | Study Selection <sup>5</sup> | Data Extraction <sup>6</sup> | Excluded Studies <sup>7</sup> | Included Studies <sup>8</sup> | RoB Assessment <sup>9</sup> | Funding Sources <sup>10</sup> | Statistical Methods <sup>11</sup> | Impact of RoB <sup>12</sup> | RoB Results <sup>13</sup> | Heterogeneity <sup>14</sup> | Publication Bias <sup>15</sup> | COI <sup>16</sup> | Rating score <sup>17</sup> | Overall Rating <sup>18</sup> |
|-----------------|-------------------|-------------------------------|-------------------------------------|------------------------------|------------------------------|------------------------------|-------------------------------|-------------------------------|-----------------------------|-------------------------------|-----------------------------------|-----------------------------|---------------------------|-----------------------------|--------------------------------|-------------------|----------------------------|------------------------------|
| Samitz 2011     | Yes               | No                            | Yes                                 | Yes                          | PY                           | PY                           | Yes                           | Yes                           | No                          | Yes                           | Yes                               | Yes                         | No                        | PY                          | Yes                            | Yes               | <b>0.71</b>                | <b>Low</b>                   |
| Coenen 2018     | Yes               | Yes                           | Yes                                 | Yes                          | PY                           | PY                           | Yes                           | Yes                           | Yes                         | Yes                           | Yes                               | No                          | Yes                       | No                          | Yes                            | Yes               | <b>0.78</b>                | <b>Moderate</b>              |
| Wendel Vos 2004 | Yes               | No                            | PY                                  | No                           | No                           | Yes                          | No                            | Yes                           | Yes                         | No                            | Yes                               | Yes                         | Yes                       | Yes                         | Yes                            | No                | <b>0.59</b>                | <b>Low</b>                   |
| Jian Li 2013    | Yes               | No                            | Yes                                 | PY                           | No                           | No                           | No                            | Yes                           | No                          | No                            | PY                                | No                          | No                        | No                          | PY                             | Yes               | <b>0.34</b>                | <b>Critically low</b>        |
| Sattelmair 2011 | Yes               | No                            | Yes                                 | PY                           | PY                           | PY                           | PY                            | Yes                           | No                          | Yes                           | Yes                               | No                          | No                        | no                          | Yes                            | Yes               | <b>0.56</b>                | <b>Low</b>                   |
| Wolin 2009      | Yes               | No                            | Yes                                 | PY                           | No                           | No                           | No                            | No                            | No                          | No                            | PY                                | PY                          | No                        | PY                          | Yes                            | No                | <b>0.31</b>                | <b>Critically low</b>        |
| Mahmood, 2017   | Yes               | Yes                           | Yes                                 | PY                           | PY                           | PY                           | PY                            | Yes                           | No                          | No                            | Yes                               | No                          | No                        | PY                          | Yes                            | Yes               | <b>0.59</b>                | <b>Low</b>                   |
| Boyle 2012      | Yes               | No                            | Yes                                 | PY                           | PY                           | PY                           | PY                            | Yes                           | Yes                         | Yes                           | Yes                               | Yes                         | Yes                       | PY                          | Yes                            | Yes               | <b>0.78</b>                | <b>Moderate</b>              |
| Samad 2005      | Yes               | No                            | Yes                                 | PY                           | No                           | No                           | No                            | Yes                           | No                          | No                            | Yes                               | No                          | No                        | No                          | No                             | No                | <b>0.28</b>                | <b>Critically low</b>        |
| Robsahm 2013    | Yes               | No                            | Yes                                 | PY                           | No                           | No                           | No                            | Yes                           | PY                          | No                            | Yes                               | Yes                         | Yes                       | Yes                         | No                             | Yes               | <b>0.56</b>                | <b>Low</b>                   |
| Wu Y, 2013      | Yes               | No                            | Yes                                 | PY                           | PY                           | PY                           | No                            | Yes                           | No                          | No                            | Yes                               | No                          | No                        | Yes                         | Yes                            | PY                | <b>0.5</b>                 | <b>Low</b>                   |
| Pizot 2016      | Yes               | No                            | Yes                                 | PY                           | PY                           | No                           | No                            | Yes                           | No                          | Yes                           | No                                | no                          | No                        | Yes                         | Yes                            | Yes               | <b>0.5</b>                 | <b>Low</b>                   |
| Chen X 2019     | Yes               | No                            | Yes                                 | PY                           | PY                           | PY                           | No                            | Yes                           | Yes                         | Yes                           | Yes                               | N/A                         | N/A                       | Yes                         | Yes                            | Yes               | <b>0.75</b>                | <b>Moderate</b>              |
| Voskuil 2007    | Yes               | No                            | Yes                                 | No                           | No                           | Yes                          | No                            | Yes                           | Yes                         | Yes                           | Yes                               | No                          | No                        | PY                          | Yes                            | No                | <b>0.53</b>                | <b>Low</b>                   |
| Schmid 2015     | Yes               | No                            | Yes                                 | PY                           | No                           | PY                           | No                            | Yes                           | Yes                         | No                            | Yes                               | Yes                         | Yes                       | Yes                         | Yes                            | Yes               | <b>0.69</b>                | <b>Low</b>                   |
| Vermaete 2013   | Yes               | No                            | Yes                                 | PY                           | No                           | Yes                          | PY                            | Yes                           | Yes                         | Yes                           | Yes                               | No                          | No                        | PY                          | No                             | Yes               | <b>0.56</b>                | <b>Low</b>                   |
| Singh 2014      | Yes               | Yes                           | Yes                                 | PY                           | Yes                          | PY                           | No                            | Yes                           | Yes                         | Yes                           | Yes                               | Yes                         | PY                        | PY                          | Yes                            | Yes               | <b>0.75</b>                | <b>Moderate</b>              |

|                     |     |     |     |     |     |     |     |     |     |     |     |     |     |     |     |     |      |                |          |
|---------------------|-----|-----|-----|-----|-----|-----|-----|-----|-----|-----|-----|-----|-----|-----|-----|-----|------|----------------|----------|
| Psaltopoulou 2015   | Yes | No  | Yes | PY  | PY  | PY  | PY  | Yes | Yes | No  | Yes | No  | No  | PY  | Yes | Yes | 0.81 | Moderate       |          |
| Chen Y 2014         | Yes | No  | Yes | PY  | PY  | PY  | PY  | Yes | Yes | Yes | Yes | Yes | Yes | No  | Yes | Yes | 0.69 | Low            |          |
| Behrens 2014        | Yes | No  | Yes | Yes | No  | No  | No  | Yes | Yes | No  | Yes | Yes | PY  | PY  | No  | No  | 0.5  | Low            |          |
| Behrens, 2013       | Yes | no  | Yes | Yes | No  | No  | PY  | Yes | Yes | No  | Yes | Yes | No  | Yes | Yes | no  | 0.59 | Low            |          |
| Shephard 2016       | Yes | No  | Yes | PY  | No  | No  | No  | Yes | No  | Yes | N/A | N/A | N/A | N/A | N/A | Yes | 0.5  | Low            |          |
| Krstev 2019         | Yes | No  | Yes | No  | No  | no  | PY  | Yes | no  | Yes | NO  | No  | No  | PY  | no  | Yes | 0.38 | Critically low |          |
| Benke, 2018         | Yes | No  | Yes | PY  | No  | PY  | PY  | Yes | Yes | Yes | Yes | Yes | No  | PY  | Yes | Yes | 0.69 | Low            |          |
| Shephard, 2017      | Yes | No  | Yes | PY  | No  | No  | No  | Yes | No  | Yes | N/A | N/A | N/A | N/A | No  | Yes | 0.5  | Low            |          |
| Liu 2011            | Yes | No  | Yes | Yes | No  | Yes | PY  | Yes | Yes | Yes | Yes | Yes | Yes | PY  | Yes | Yes | 0.81 | Moderate       |          |
| O Rorke, 2010       | Yes | No  | Yes | Yes | PY  | PY  | No  | Yes | Yes | Yes | Yes | Yes | No  | No  | PY  | Yes | No   | 0.59           | Low      |
| Bao 2008            | Yes | No  | Yes | PY  | No  | No  | PY  | Yes | No  | Yes | Yes | Yes | No  | PY  | No  | Yes | Yes  | 0.53           | Low      |
| Keimling 2014       | Yes | No  | Yes | PY  | PY  | No  | PY  | Yes | No  | No  | Yes | No  | No  | Yes | Yes | No  | 0.47 | Critically low |          |
| Aune 2015           | Yes | No  | Yes | Yes | No  | No  | Yes | Yes | Yes | Yes | Yes | Yes | PY  | PY  | Yes | Yes | Yes  | 0.75           | Moderate |
| McWilliams 2011     | Yes | No  | Yes | Yes | No  | PY  | PY  | Yes | Yes | Yes | No  | No  | No  | No  | No  | Yes | 0.5  | Low            |          |
| Gignac 2019         | Yes | No  | Yes | Yes | Yes | No  | No  | Yes | Yes | Yes | N/A | N/A | N/A | N/A | No  | no  | 0.58 | Low            |          |
| Palmer 2012         | Yes | No  | No  | PY  | No  | No  | No  | Yes | Yes | Yes | N/A | N/A | N/A | N/A | No  | no  | 0.38 | Critically low |          |
| White 2017          | Yes | Yes | Yes | Yes | Yes | Yes | PY  | Yes | Yes | Yes | Yes | Yes | PY  | Yes | PY  | PY  | Yes  | 0.88           | Moderate |
| Yang B, 2018        | Yes | No  | Yes | PY  | PY  | No  | No  | Yes | No  | PY  | Yes | No  | No  | Yes | Yes | No  | 0.5  | Low            |          |
| Huai 2013           | Yes | No  | Yes | PY  | No  | PY  | PY  | Yes | Yes | Yes | Yes | Yes | No  | No  | Yes | Yes | no   | 0.59           | Low      |
| Total amount of Yes | 36  | 4   | 34  | 10  | 3   | 5   | 3   | 35  | 21  | 23  | 26  | 11  | 7   | 11  | 24  | 23  |      |                |          |

Abbreviations: COI = conflict of interest; PECO = population, exposure, comparator, outcome; PY = partial yes; RoB = risk of bias

<sup>1</sup> Did the research questions and inclusion criteria for the review include the components of PICO/PECO?

<sup>2</sup> Did the report of the review contain an explicit statement that the review methods were established prior to the conduct of the review and did the report justify any significant deviations from the protocol?

<sup>3</sup> Did the review authors explain their selection of the study designs for inclusion in the review?

<sup>4</sup> Did the review authors use a comprehensive literature search strategy?

<sup>5</sup> Did the review authors perform study selection in duplicate?

<sup>6</sup> Did the review authors perform data extraction in duplicate?

<sup>7</sup> Did the review authors provide a list of excluded studies and justify the exclusions?

<sup>8</sup> Did the review authors describe the included studies in adequate detail?

- <sup>9</sup> Did the review authors use a satisfactory technique for assessing the risk of bias (RoB) in individual studies that were included in the review?
- <sup>10</sup> Did the review authors report on the sources of funding for the studies included in the review?
- <sup>11</sup> If meta-analysis was performed did the review authors use appropriate methods for statistical combination of results?
- <sup>12</sup> If meta-analysis was performed, did the review authors assess the potential impact of RoB in individual studies on the results of the meta-analysis or other evidence synthesis?
- <sup>13</sup> Did the review authors account for RoB in individual studies when interpreting/ discussing the results of the review?
- <sup>14</sup> Did the review authors provide a satisfactory explanation for, and discussion of, any heterogeneity observed in the results of the review?
- <sup>15</sup> If they performed quantitative synthesis did the review authors carry out an adequate investigation of publication bias (small study bias) and discuss its likely impact on the results of the review?
- <sup>16</sup> Did the review authors report any potential sources of conflict of interest, including any funding they received for conducting the review?
- <sup>17</sup> Shea et al. 2017. AMSTAR 2: a critical appraisal tool for systematic reviews that include randomised or non-randomised studies of healthcare interventions, or both. (7)
