# Supplementary material for: How does occupational physical activity influence health? An umbrella review of 23 health outcomes across 158 observational studies
Source: HighWire-hosted journal article supplement (doi:10.1136/bjsports-2020-102587), 2020-11-25
Supplement: bjsports-2020-102587supp006_data_supplement.pdf [file bjsports-2020-102587supp006_data_supplement.pdf]

Supplementary material 6: GRADE tables

|      |                                          |    |
|------|------------------------------------------|----|
| 1.0. | All-cause mortality .....                | 2  |
| 2.0  | Cardio-vascular disease .....            | 4  |
| 2.1  | Stroke .....                             | 4  |
| 2.2  | Coronary Heart Disease .....             | 5  |
| 3.0  | Cancer.....                              | 6  |
| 3.1  | Colon cancer .....                       | 6  |
| 3.2  | Rectal cancer .....                      | 8  |
| 3.3  | Breast cancer.....                       | 9  |
| 3.4  | Endometrial cancer. ....                 | 11 |
| 3.5  | Lymphoma (Hodgkin and non-Hodgkin) ..... | 13 |
| 3.6  | Gastric cancer .....                     | 14 |
| 3.7  | Oesophageal cancer .....                 | 17 |
| 3.8  | Renal cancer .....                       | 18 |
| 3.9  | Prostate cancer.....                     | 20 |
| 3.10 | Pancreatic cancer .....                  | 23 |
| 3.11 | Bladder cancer.....                      | 24 |
| 4.0  | Diabetes Mellitus type 2.....            | 25 |
| 5.0  | Osteoarthritis .....                     | 26 |
| 6.0  | Mental Health.....                       | 28 |
| 7.0  | Sleep quality and/or duration .....      | 29 |
| 8.0  | Hypertension .....                       | 30 |

1.0. All-cause mortality

**Population:** Adults (aged 18-64 years)  
**Exposure:** Duration, frequency and/or intensity of OPA, or a compositional score reflecting total volume of OPA.  
**Comparison:** No OPA, or a lesser duration, frequency and/or intensity, no or a smaller compositional score of total volume of OPA.  
**Outcome:** All-cause mortality.

| Certainty assessment |              |              |               |              |             |                      | Summary of findings | Certainty | Importance |
|----------------------|--------------|--------------|---------------|--------------|-------------|----------------------|---------------------|-----------|------------|
| № of studies         | Study design | Risk of bias | Inconsistency | Indirectness | Imprecision | Other considerations |                     |           |            |

Domains of physical activity and all-cause mortality: systematic review and dose–response meta-analysis of cohort studies (Samitz, G. 2012)(1)  
82412/17069 (no of participants/deaths)

|                |                     |                      |                      |             |             |      |                                                                                                                                                                                                                                                                                                                                                                                                                                                             |                  |            |
|----------------|---------------------|----------------------|----------------------|-------------|-------------|------|-------------------------------------------------------------------------------------------------------------------------------------------------------------------------------------------------------------------------------------------------------------------------------------------------------------------------------------------------------------------------------------------------------------------------------------------------------------|------------------|------------|
| 6 <sup>a</sup> | Prospective studies | Serious <sup>c</sup> | Serious <sup>d</sup> | Not serious | Not serious | None | This review compared highest with lowest PA levels in the association with mortality.<br><br><b>OPA</b><br>Associations were found for OPA (RR=0.83; 95% CI 0.71–0.97)<br>OPA: 4 studies in men; (RR=0.94; 95% CI 0.75-1.19) 90,8% I <sup>2</sup><br>OPA: 3 studies in women: (RR=0.66; 95% CI 0.49-0.89) 89% I <sup>2</sup><br><br><b>LTPA:</b><br>The strongest associations between PA and mortality were observed for LTPA (RR 0.74; 95% CI 0.70–0.77), | Low <sup>i</sup> | Critically |
|----------------|---------------------|----------------------|----------------------|-------------|-------------|------|-------------------------------------------------------------------------------------------------------------------------------------------------------------------------------------------------------------------------------------------------------------------------------------------------------------------------------------------------------------------------------------------------------------------------------------------------------------|------------------|------------|

Do highly physically active workers die early? A systematic review with meta-analysis of data from 193 696 participants. (Coenen, 2018)(2)

|                 |                            |                      |                      |             |                      |                                            |                                                                                                                                                                                                                                                                                                                                                                                                       |                  |            |
|-----------------|----------------------------|----------------------|----------------------|-------------|----------------------|--------------------------------------------|-------------------------------------------------------------------------------------------------------------------------------------------------------------------------------------------------------------------------------------------------------------------------------------------------------------------------------------------------------------------------------------------------------|------------------|------------|
| 17 <sup>b</sup> | Prospective cohort studies | Serious <sup>e</sup> | Serious <sup>f</sup> | Not serious | Not serious          | Some risk of publication bias <sup>h</sup> | This review compared workers with high level of OPA with low level of OPA in association with mortality:<br><br><b>OPA MEN:</b><br>Pooled results showed that male workers with high level OPA had a statistically significant higher mortality risk than those engaging in low level OPA (HR 1.18, 95% CI 1.05 to 1.34, I <sup>2</sup> =76%)<br><br><b>LTPA:</b><br>LTPA not assessed in this review | Low <sup>i</sup> | Critically |
| 11              | Prospective cohort studies | Serious <sup>e</sup> | Not serious          | Not serious | Serious <sup>g</sup> | Some risk of publication bias <sup>h</sup> | <b>OPA WOMEN:</b><br><br>A non-significant tendency for an inverse association was found among women (HR=0.90; 95% CI 0.80 to 1.01), I <sup>2</sup> =0%).                                                                                                                                                                                                                                             | Low <sup>k</sup> | Critically |

a: Eaton 1995; Andersen 2000; Yu 2003; Barengo 2004; Lissner 1996; Besson 2008  
b: Petersen 2012; Hu G 2014; Clays 2014; Harari 2015; Richard 2015; Etemadi; 2014; Menotti 2006; Chau 2015; Holtermann 2012; Holtermann 2010; Stender 1993; Wanner 2014; Holtermann 2011; Turi 2017; Huerta 2016; Krause 2017  
c: Serious: We can't rule out residual confounding; The assessment of physical activity at baseline only, may also have introduced bias, particularly in studies of longer duration  
d: Serious risk of inconsistency: high heterogeneity in the studies. Different results for men and women.

e: Serious: Possible conservative misclassification bias, leading to an underestimation of the magnitude of the association/ Studies included in this review were based only on self-reports of occupational PA

f: Serious risk of inconsistency: there was considerable heterogeneity in our pooled study findings, with up to 77% heterogeneity in the main findings.

g: Serious imprecision for women because 1.00 was in Confidence interval.

h: We do not rate down because only some risk is detected: Some risk of publication bias with under-publication of negative and underpowered results.

i: rated down from high to low because of serious risk of bias and serious inconsistency

j: rated down from high to low because of serious risk of bias and serious inconsistency

k: rated down from high to low because of serious risk of bias and serious imprecision.

2.0 Cardio-vascular disease

2.1 Stroke

**Population:** Adults (aged 18-64 years)  
**Exposure:** Duration, frequency and/or intensity of OPA, or a compositional score reflecting total volume of OPA.  
**Comparison:** No OPA, or a lesser duration, frequency and/or intensity, no or a smaller compositional score of total volume of OPA.  
**Outcome:** Cardio-vascular disease.

| Certainty assessment                                                                       |                |                      |                      |              |                      |                      | Summary of findings                                                                                                                                                                                                                                                                                                                                                                                                                                                                                                                                                                         | Certainty                                     | Importance |
|--------------------------------------------------------------------------------------------|----------------|----------------------|----------------------|--------------|----------------------|----------------------|---------------------------------------------------------------------------------------------------------------------------------------------------------------------------------------------------------------------------------------------------------------------------------------------------------------------------------------------------------------------------------------------------------------------------------------------------------------------------------------------------------------------------------------------------------------------------------------------|-----------------------------------------------|------------|
| No of studies                                                                              | Study design   | Risk of bias         | Inconsistency        | Indirectness | Imprecision          | Other considerations |                                                                                                                                                                                                                                                                                                                                                                                                                                                                                                                                                                                             |                                               |            |
| Physical activity and stroke. A meta-analysis of observational data. (Wendel-Vos 2004) (3) |                |                      |                      |              |                      |                      |                                                                                                                                                                                                                                                                                                                                                                                                                                                                                                                                                                                             |                                               |            |
| 11 <sup>a</sup>                                                                            | Cohort studies | Serious <sup>c</sup> | Serious <sup>d</sup> | Not serious  | Serious <sup>e</sup> | Serious <sup>i</sup> | <p>This review compared three groups (active, moderately active and inactive)</p> <p><b>OPA:</b></p> <p>People who were physically active at work were at lower risk of stroke compared with both physically inactive (RR = 0.74, 95% CI: 0.49- 1.12) and moderately physically active (RR = 0.92, 95% CI: 0.6, 1.24) people at the workplace.</p> <p><b>LTPA:</b></p> <p>People who were active in their leisure time were at lower risk of total stroke compared with both physically active were (RR=0.78, 95% 0.71-0.85) and moderately physically active (RR=0.95, 95% 0.68- 1.32)</p> | <i>Total stroke:</i><br>Very low <sup>g</sup> | Critically |
| 5                                                                                          | Cohort studies | Serious              | Not serious          | Not serious  | Not serious          | Serious <sup>i</sup> | <p><b>OPA:</b></p> <p>People who were physically active at work were at lower risk of Ischaemic stroke compared with both physically inactive (RR = 0.57, 95% CI: 0.43, 0.77) and moderately physically active (RR = 0.77, 95% CI: 0.60, 0.98) people at the workplace.</p> <p><b>LTPA:</b></p> <p>People who were active in their leisure time were at lower risk of ischaemic stroke compared with inactive (RR= 0.79, 95% 0.69-0.91) and moderately active (RR=0.84, 95% 0.63-1.11).</p>                                                                                                 | <i>Ischaemic stroke:</i> Low <sup>h</sup>     | Critically |

Physical activity and risk of cardiovascular disease: What does the new epidemiological evidence show? (Li J. 2013) (4) Overall CVD risks/ Coronary heart disease/stroke/unclassified CVD

This article was excluded from further analyses as it was judged to not provide an accurate summary of the available evidence. (AMSTAR2 rating)

2.2 Coronary Heart Disease

Dose Response Between Physical Activity and Risk of Coronary Heart Disease (Sattelmair 2011) (5) Coronary Heart Disease.

|                |                |                      |             |             |             |                      |                                                                                                                                                                                                                                                                                                                                                                                                                                                                                                          |                  |            |
|----------------|----------------|----------------------|-------------|-------------|-------------|----------------------|----------------------------------------------------------------------------------------------------------------------------------------------------------------------------------------------------------------------------------------------------------------------------------------------------------------------------------------------------------------------------------------------------------------------------------------------------------------------------------------------------------|------------------|------------|
| 4 <sup>b</sup> | Cohort studies | Serious <sup>f</sup> | Not Serious | Not serious | Not serious | Serious <sup>j</sup> | <p>This review compared the highest to the categories of PA for each type of PA using random effects pooled RRs.</p> <p><b>OPA :</b></p> <p>OPA was associated with a reduction (RR=0.84, 95% CI; 0.79-0.90) risk of CHD. 3 out of 4 studies were based on men (RR=0.87, CI 95% 0.81-0.99). Heterogeneity (I<sup>2</sup>) was 0%</p> <p><b>LTPA:</b></p> <p>The pooled risk among all studies that assessed LTPA indicated a risk reduction (RR, 0.74; 95% CI, 0.69-0.78) in Coronary Heart Disease.</p> | Low <sup>i</sup> | Critically |
|----------------|----------------|----------------------|-------------|-------------|-------------|----------------------|----------------------------------------------------------------------------------------------------------------------------------------------------------------------------------------------------------------------------------------------------------------------------------------------------------------------------------------------------------------------------------------------------------------------------------------------------------------------------------------------------------|------------------|------------|

a: Okada 1976; Paffenbarger 1978; Salonen 1982; Menotti 1990; Haheim 1996; Gillum 1996; Nakayama 1997; Evenson 1999

b: Eaton 1995; Rosengren 1997; Hu 2007; Virkkunen 2007.

c: Serious; The definitions of high, moderate, and low levels of physical activity varied substantially among studies. In the meta-analysis the degree of adjustment variables varied from study to study

d: Serious; High heterogeneity

e: Serious imprecision for total stroke, but not for ischaemic stroke.

f: Serious; primary source of potential residual confounding is likely to stem from confounding variables that were either unmeasured or insufficiently measured in the individual studies themselves. For instance, dietary intake was rarely assessed in the studies reviewed.

g: certainty downgraded from high to very low because of serious risk of bias and serious inconsistency and serious imprecision and publication bias

h: certainty downgraded from high to low because of serious risk of bias and publication bias

i: certainty downgraded form high to low because of serious risk of bias and publication bias

J: Rated down for publication bias because it was not calculated and could not be re-analysed

### 3.0 Cancer

#### 3.1 Colon cancer

**Population:** Adults (aged 18-64 years)

**Exposure:** Duration, frequency and/or intensity of OPA, or a compositional score reflecting total volume of OPA.

**Comparison:** No OPA, or a lesser duration, frequency and/or intensity, no or a smaller compositional score of total volume of OPA.

**Outcome:** Colon cancer

| Certainty assessment |              |              |               |              |             |                      | Summary of findings | Certainty | Importance |
|----------------------|--------------|--------------|---------------|--------------|-------------|----------------------|---------------------|-----------|------------|
| No of studies        | Study design | Risk of bias | Inconsistency | Indirectness | Imprecision | Other considerations |                     |           |            |

#### Physical activity and colon cancer prevention: a meta-analysis (Wolin, 2009) (6)

This article was excluded from further analyses as it was judged to not provide an accurate summary of the available evidence (AMSTAR2 rating)

#### Domain-specific physical activity and sedentary behavior in relation to colon and rectal cancer risk: A systematic review and meta analyses (Mahmood, 2017) (7)

|                 |                                     |                      |             |             |             |             |                                                                                                                                                                                                                                                                                                                                                                                                                                                                                                                                                                                                                                              |                       |            |
|-----------------|-------------------------------------|----------------------|-------------|-------------|-------------|-------------|----------------------------------------------------------------------------------------------------------------------------------------------------------------------------------------------------------------------------------------------------------------------------------------------------------------------------------------------------------------------------------------------------------------------------------------------------------------------------------------------------------------------------------------------------------------------------------------------------------------------------------------------|-----------------------|------------|
| 15 <sup>a</sup> | 5 Cohort studies<br>10 case control | Serious <sup>d</sup> | Not serious | Not serious | Not serious | Not serious | This review compared the highest vs the lowest category of PA.<br><b>OPA:</b><br>OPA was inversely associated with risk of colon cancer (RR=0.74, 95% CI: 0.67-0.82).<br>The OPA association was stronger for men than for women, but sex also explained little of the heterogeneity.<br><b>Dose response:</b><br>From the dose-response analyses, the pooled RR per 210 MET h/week was RR=0.89, 95% CI: 0.85- 0.93)<br><b>LTPA:</b><br>LTPA was inversely associated with risk of colon cancer(RR=0.80 ,95% CI: 0.71-0.89)<br>The LTPA association was stronger for men than for women, but sex also explained little of the heterogeneity. | Moderate <sup>h</sup> | Critically |
|-----------------|-------------------------------------|----------------------|-------------|-------------|-------------|-------------|----------------------------------------------------------------------------------------------------------------------------------------------------------------------------------------------------------------------------------------------------------------------------------------------------------------------------------------------------------------------------------------------------------------------------------------------------------------------------------------------------------------------------------------------------------------------------------------------------------------------------------------------|-----------------------|------------|

#### Physical Activity and Risks of Proximal and Distal Colon Cancers: A Systematic Review and Meta-analysis (Boyle, 2012) (8)

|                 |                                    |                      |                      |             |             |                  |                                                                                                                                                                                                                                                                                                                                                                                                                        |                       |            |
|-----------------|------------------------------------|----------------------|----------------------|-------------|-------------|------------------|------------------------------------------------------------------------------------------------------------------------------------------------------------------------------------------------------------------------------------------------------------------------------------------------------------------------------------------------------------------------------------------------------------------------|-----------------------|------------|
| 10 <sup>b</sup> | 6 cohort studies<br>4 case control | Serious <sup>e</sup> | Serious <sup>f</sup> | Not serious | Not serious | Publication bias | This review compared the highest and lowest category of PA that were used for the main results.<br><b>OPA:</b><br>OPA was inversely related with proximal colon cancer (RR= 0.72; 95% CI: 0.61-0.85) and distal colon cancer (RR= 0.75, 95% CI: 0.63-0.88).<br><b>LTPA:</b><br>LTPA was inversely related with proximal colon cancer (RR=0.84, 95% CI: 0.76-0.92) and distal colon cancer (RR=0.74, 95% CI: 0.66-0.83) | Very low <sup>i</sup> | Critically |
|-----------------|------------------------------------|----------------------|----------------------|-------------|-------------|------------------|------------------------------------------------------------------------------------------------------------------------------------------------------------------------------------------------------------------------------------------------------------------------------------------------------------------------------------------------------------------------------------------------------------------------|-----------------------|------------|

#### A meta-analysis of the association of physical activity with reduced risk of colorectal cancer (Samad, 2005) (9)

This article was excluded from further analyses as it was judged to not provide an accurate summary of the available evidence (AMSTAR2 rating)

Body mass index, physical activity, and colorectal cancer by anatomical sub sites: a systematic review and meta-analysis of cohort studies (Robsahm. 2013) (10)

|                |                |                      |             |             |             |                  |                                                                                                                                                                                                                                                                                                                                                                                                                                                                                         |                  |            |
|----------------|----------------|----------------------|-------------|-------------|-------------|------------------|-----------------------------------------------------------------------------------------------------------------------------------------------------------------------------------------------------------------------------------------------------------------------------------------------------------------------------------------------------------------------------------------------------------------------------------------------------------------------------------------|------------------|------------|
| 5 <sup>c</sup> | Cohort studies | Serious <sup>g</sup> | Not serious | Not serious | Not serious | Publication bias | This review compared the most physically active vs those who were the least physically active.<br><b>OPA:</b><br>OPA was inversely related with proximal colon cancer; (RR=0.59, 95% CI: 0.53-0.66)<br>OPA activity was inversely related with distal colon cancer (RR=0.61, 95% CI: 0.53-0.70)<br><br><b>LTPA:</b><br>LTPA was inversely related with proximal colon cancer: (RR=0.53, 95% CI: 0.44-0.64)<br>LTPA was inversely related with distal colon (RR=0.40, 95% CI: 0.30-0.53) | low <sup>i</sup> | Critically |
|----------------|----------------|----------------------|-------------|-------------|-------------|------------------|-----------------------------------------------------------------------------------------------------------------------------------------------------------------------------------------------------------------------------------------------------------------------------------------------------------------------------------------------------------------------------------------------------------------------------------------------------------------------------------------|------------------|------------|

a: Cohort studies 5; Morati, 2008; Larsson 2006; Colbert 2001; Thune 1996; Boyle 2011; Case control 10: Parent 2011; Isomura 2006; Kato 1990; Arbmman 1993; Markowitz 1992; Zhang 2006; Hou 2004; White 1996; Brownson 1991; Slattery 1990.

b: 6 cohort studies: Boyle 2011; Colbert 2001; Freidenreich 2006; Howard 2008; Larsson 2000; Maradi 2008. 4 case control studies; Isomura 2006; Levi 1999; Brownson 1989; Vena 1985.

c: Gerhardsson et al., 1986; Thune and Lund, 1996; Friedenreich et al., 2006; Larsson et al., 2006; Moradi et al., 2008

d: Serious; Variable methods were used to measure the extent of physical activity in occupations, ranging from enquiring about the years spent in active jobs to asking whether the jobs involved light activity only (i.e. occasional walking) or doing heavy manual labour. There was considerable variation between studies with regard to adjustment for confounding, which may have affected estimates of the associations between domain-specific physical activity/sedentary behaviour and colon and rectal cancer risk, and therefore upon our results

e: Serious: our results do not provide any information about the duration, frequency, intensity, or timing of physical activity required to optimally reduce the risk of colon cancer

f: Serious: Although we found low statistical heterogeneity in the primary meta-analysis and in the subgroup analyses, as with most meta-analyses of observational studies, the included studies were conducted on different population groups, and the measurement and categorization of the exposure (physical activity) was highly heterogeneous.

g: Moreover, it is difficult to measure the level of physical activity in a valid and reliable way, and it is particularly difficult to assess the lifetime level of activity

h: certainty downgraded from high to moderate because of serious risk of bias

i: certainty downgraded from high to low because of serious risk of bias and inconsistency

j: certainty downgraded from high to low because of serious risk of bias and publication bias.

3.2 Rectal cancer

**Population:** Adults (aged 18-64 years)  
**Exposure:** Duration, frequency and/or intensity of OPA, or a compositional score reflecting total volume of OPA.  
**Comparison:** No OPA, or a lesser duration, frequency and/or intensity, no or a smaller compositional score of total volume of OPA.  
**Outcome:** Rectal cancer

| Certainty assessment                                                                                                                                             |                            |                           |               |              |             |                      | Summary of findings                                                                                                                                                                                                                                                                                                                                     | Certainty             | Importance |
|------------------------------------------------------------------------------------------------------------------------------------------------------------------|----------------------------|---------------------------|---------------|--------------|-------------|----------------------|---------------------------------------------------------------------------------------------------------------------------------------------------------------------------------------------------------------------------------------------------------------------------------------------------------------------------------------------------------|-----------------------|------------|
| № of studies                                                                                                                                                     | Study design               | Risk of bias              | Inconsistency | Indirectness | Imprecision | Other considerations |                                                                                                                                                                                                                                                                                                                                                         |                       |            |
| Domain-specific physical activity and sedentary behaviour in relation to colon and rectal cancer risk: A systematic review and meta-analysis (Mahmood, 2017) (7) |                            |                           |               |              |             |                      |                                                                                                                                                                                                                                                                                                                                                         |                       |            |
| 12 <sup>a</sup>                                                                                                                                                  | 5 cohort<br>7 case control | Serious <sup>c</sup>      | Not serious   | Not serious  | Not serious | none                 | This review compared the highest versus the lowest category of PA.<br><br><b>OPA:</b><br>OPA was inversely associated with rectal cancer risk (RR= 0.88, 95% CI: 0.79, 0.98). Low heterogeneity for rectal cancer.<br><br><b>LTPA:</b><br>A weak association was observed with rectal cancer: (RR= 0.87, 95% CI: 0.75, 1.01)                            | Moderate <sup>e</sup> | Critically |
| Body mass index, physical activity, and colorectal cancer by anatomical subsites: a systematic review and meta-analysis of cohort studies (Robsahm. 2013) (10)   |                            |                           |               |              |             |                      |                                                                                                                                                                                                                                                                                                                                                         |                       |            |
| 3 <sup>b</sup>                                                                                                                                                   | Cohort studies             | Very serious <sup>d</sup> | Not serious   | Not serious  | Not serious | Publication bias     | This review compared those in the highest PA level compared with those least active<br><br><b>OPA:</b><br>An inverse association was observed between OPA and the risk of rectum cancer (RR=0.80, 95% CI: 0.72-0.89)<br><br><b>LTPA:</b><br>An inverse association was observed between LTPA and the risk of rectal cancer (RR=0.66, 95% CI: 0.55-0.79) | Very low <sup>f</sup> | Critically |

a: Cohort studies 5; Morati, 2008; Larsson 2006; Colbert 2001; Thune 1996; Boyle 2011. Case control 7 studies; Parent 2011; Isomura 2006; Kato 1990; Arbmán 1993; Markowitz 1992; Longnecker 1995; Slattery 2003  
b: Friedenreich 2006; Larsson 2006; Moradi 2008.  
c: Serious; Variable methods were used to measure the extent of physical activity in occupations, ranging from enquiring about the years spent in active jobs to asking whether the jobs involved light activity only (i.e. occasional walking) or doing heavy manual labour. There was considerable variation between studies with regard to adjustment for confounding, which may have affected estimates of the associations between domain-specific physical activity/sedentary behaviour and colon and rectal cancer risk, and therefore upon our results.  
d: Moreover, it is difficult to measure the level of physical activity in a valid and reliable way, and it is particularly difficult to assess the lifetime level of activity. There were only three studies included in the review.  
e: Certainty rated from high to moderate because of serious risk of bias  
f: Certainty rated from high to low because of very serious risk of bias

### 3.3 Breast cancer

**Population:** Adults (aged 18-64 years)

**Exposure:** Duration, frequency and/or intensity of OPA, or a compositional score reflecting total volume of OPA.

**Comparison:** No OPA, or a lesser duration, frequency and/or intensity, no or a smaller compositional score of total volume of OPA.

**Outcome:** Breast cancer

| Certainty assessment |              |              |               |              |             |                      | Summary of findings | Certainty | Importance |
|----------------------|--------------|--------------|---------------|--------------|-------------|----------------------|---------------------|-----------|------------|
| Nº of studies        | Study design | Risk of bias | Inconsistency | Indirectness | Imprecision | Other considerations |                     |           |            |

#### Physical activity and risk of breast cancer: a meta-analysis of prospective studies (Wu Y, 2013) (11)

|                |                |                      |                          |             |             |         |                                                                                                                                                                                                                                                                                                                                                     |                       |            |
|----------------|----------------|----------------------|--------------------------|-------------|-------------|---------|-----------------------------------------------------------------------------------------------------------------------------------------------------------------------------------------------------------------------------------------------------------------------------------------------------------------------------------------------------|-----------------------|------------|
| 7 <sup>a</sup> | Cohort studies | Serious <sup>d</sup> | Not serious <sup>e</sup> | Not serious | Not serious | Serious | This review compared to the highest versus lowest categories of PA.<br><b>OPA:</b><br>An inverse association was observed between OPA and the risk of breast cancer risk (RR = 0.90, 95 % CI = 0.83–0.97)<br><br><b>LTPA:</b><br>An inverse association was observed between LTPA and the risk of breast cancer risk (RR= 0.89, 95% CI = 0.85-0.92) | Very low <sup>h</sup> | Critically |
|----------------|----------------|----------------------|--------------------------|-------------|-------------|---------|-----------------------------------------------------------------------------------------------------------------------------------------------------------------------------------------------------------------------------------------------------------------------------------------------------------------------------------------------------|-----------------------|------------|

#### Physical activity, hormone replacement therapy and breast cancer risk: A meta-analysis of prospective studies (Pizot, 2015) (12)

|                 |                |                      |             |             |             |         |                                                                                                                                                                                                                                                                                                                      |                  |            |
|-----------------|----------------|----------------------|-------------|-------------|-------------|---------|----------------------------------------------------------------------------------------------------------------------------------------------------------------------------------------------------------------------------------------------------------------------------------------------------------------------|------------------|------------|
| 11 <sup>b</sup> | Cohort studies | Serious <sup>f</sup> | Not serious | Not serious | Not serious | Serious | They compared the highest versus lowest level of PA.<br><b>OPA:</b><br>An inverse association was observed between OPA and the risk of breast cancer (RR=0.88, 95% CI= 0.82-0.95)<br><br><b>LTPA:</b><br>An inverse association was observed between LTPA and the risk of breast cancer (RR= 0.87, 95% CI=0.84-0.91) | low <sup>i</sup> | Critically |
|-----------------|----------------|----------------------|-------------|-------------|-------------|---------|----------------------------------------------------------------------------------------------------------------------------------------------------------------------------------------------------------------------------------------------------------------------------------------------------------------------|------------------|------------|

#### Physical Activity and Risk of Breast Cancer: A Meta-Analysis of 38 Cohort Studies in 45 Study Reports (Chen, 2019) (13)

|                |                |                      |             |             |             |         |                                                                                                                                                                                                                                                                                                                   |                  |            |
|----------------|----------------|----------------------|-------------|-------------|-------------|---------|-------------------------------------------------------------------------------------------------------------------------------------------------------------------------------------------------------------------------------------------------------------------------------------------------------------------|------------------|------------|
| 6 <sup>c</sup> | Cohort studies | Serious <sup>g</sup> | Not serious | Not serious | Not serious | Serious | The highest category compared with that of the lowest category of PA<br><br><b>OPA:</b><br>OPA was related with a significantly lower risk of breast cancer (ORR 0.91; 95% CI: 0.84-0.99)<br><br><b>LTPA:</b><br>LTPA was related with a significantly lower risk of breast cancer (ORR 0.88; 95% CI: 0.85- 0.91) | low <sup>j</sup> | Critically |
|----------------|----------------|----------------------|-------------|-------------|-------------|---------|-------------------------------------------------------------------------------------------------------------------------------------------------------------------------------------------------------------------------------------------------------------------------------------------------------------------|------------------|------------|

a: Thune 1997; Moradi 2002; Rintala 2002; Pronk 2011; steindorf 2012; Luoto 2000; Mertens 2006

b: Steenland 1995; Thune 1997; Moradi 1999; Dirx 2001 ; Moradi 2002; Rintala 2002; Rintala 2003; Mertens 2006; George 2010; Pronk 2011; Steindorf 2013;

c: Steindorf 2012; Mertens 2006; Rintala 2003; Moradi 2002; Luoto 2000, Thune 1997.

d: Serious; First, a wide range of definitions of physical activity have been used in previous studies as they have not uniformly assessed all types of physical activity (i.e., occupational, household, and recreational), the dose of activity (frequency, intensity, and duration), or all time periods in life when activity was performed. There are unmeasured confounders.

e: No Serious inconsistency for OPA: 46.1%. But the overall between-study heterogeneity is common in meta-analysis because of diversity in design quality, population stratification, characteristics of the sample, non-comparable measurement of physical activity, variation of the covariates, doses, and lengths of follow up:

f: Serious; Different measurements of Occupational physical activity, different methods of confounding.

g: Serious; first, PA was more likely to be ascertained using self-administered questionnaires, which are prone to misreporting. Second, we did not have individual-level data for study participants

h: Certainty was downgraded from high to very low because of serious risk of bias and serious inconsistency and publication bias

i: Certainty was downgraded from high to low because of serious risk of bias and publication bias

j: Certainty was downgraded from high to low because of serious risk of bias publication bias

3.4 Endometrial cancer.

**Population:** Adults (aged 18-64 years)  
**Exposure:** Duration, frequency and/or intensity of OPA, or a compositional score reflecting total volume of OPA.  
**Comparison:** No OPA, or a lesser duration, frequency and/or intensity, no or a smaller compositional score of total volume of OPA.  
**Outcome:** Endometrial cancer

| Certainty assessment                                                                                        |                      |                      |                      |              |             |                               | Summary of findings                                                                                                                                                                                                                                                                                                                                                                                                                             | Certainty             | Importance |
|-------------------------------------------------------------------------------------------------------------|----------------------|----------------------|----------------------|--------------|-------------|-------------------------------|-------------------------------------------------------------------------------------------------------------------------------------------------------------------------------------------------------------------------------------------------------------------------------------------------------------------------------------------------------------------------------------------------------------------------------------------------|-----------------------|------------|
| No of studies                                                                                               | Study design         | Risk of bias         | Inconsistency        | Indirectness | Imprecision | Other considerations          |                                                                                                                                                                                                                                                                                                                                                                                                                                                 |                       |            |
| Physical Activity and Endometrial Cancer Risk, a Systematic Review of Current Evidence (Voskuil, 2007) (14) |                      |                      |                      |              |             |                               |                                                                                                                                                                                                                                                                                                                                                                                                                                                 |                       |            |
| 4 <sup>a</sup>                                                                                              | Cohort studies       | Serious <sup>d</sup> | Serious <sup>e</sup> | Not serious  | Serious     | Publication bias <sup>f</sup> | All four studies that assessed both total PA and LTPA found that the association with endometrial cancer risk was stronger for total PA than for LTPA. Overall, the evidence was less consistent for OPA than for total PA and LTPA.<br>In two of four studies that assessed OPA, a decreased risk of endometrial cancer was found in women in the highest versus the lowest category of OPA (e.g., manual/standing work versus sedentary work) | Very low <sup>h</sup> | Critically |
| 10 <sup>b</sup>                                                                                             | Case control studies | Serious <sup>d</sup> | Serious <sup>e</sup> | Not serious  | Not serious | Publication bias <sup>f</sup> | Effect estimates of eight case-control studies that reported on OPA and that included 95% CIs (summary OR, 0.80; 95% CI, 0.66-0.96).<br>Six of 10 studies reporting on OPA found a decreased risk of endometrial cancer. Two of these studies also showed some evidence for a dose-response effect; however, no P values were reported                                                                                                          | Very low <sup>i</sup> | Critically |

A systematic review and meta-analysis of physical activity and endometrial cancer risk (Schmid. 2015) (15).

|                 |                             |                      |             |             |             |      |                                                                                                                                                                                                                                                                                              |                       |            |
|-----------------|-----------------------------|----------------------|-------------|-------------|-------------|------|----------------------------------------------------------------------------------------------------------------------------------------------------------------------------------------------------------------------------------------------------------------------------------------------|-----------------------|------------|
| 19 <sup>c</sup> | 7 Cohort<br>12 Case control | Serious <sup>g</sup> | Not serious | Not serious | Not serious | none | This review compared high versus low levels of PA.<br><br><b>OPA:</b><br>OPA resulted in summary (RR= 0.81; 95 % CI 0.75–0.87) in risk reduction for endometrial cancer.<br><br><b>LTPA:</b><br>LTPA resulted in summary risk reduction for endometrial cancer (RR= 0.84; 95% CI 0.78-0.91). | Moderate <sup>j</sup> | Critically |
|-----------------|-----------------------------|----------------------|-------------|-------------|-------------|------|----------------------------------------------------------------------------------------------------------------------------------------------------------------------------------------------------------------------------------------------------------------------------------------------|-----------------------|------------|

a: Pukkala 1993; Moradi 1998; Furberg and Thune 2003; Friberg 2006  
b: Sturgeon 1993; Shu 1993; Levi 1993; Zheng 1993; Dosemeci 1993; Kalandid 1996; Olson 1997; Goodman 1997; Moradi 2000; Matthews 2005  
c: Kalandidi 1996; Furberg and Thune 2003; John 2010, Levi 1993; Sturgeon 1993; Moradi 1998; Moradi 2000; Soll-Johanning 2004; Robsahm 2010; Friedenreich 2010; Tavani 2009; Matthews 2005; Freindenreich 2007; Weiderpass 2001; Friberg 2006; Gierach 2009  
d: Serious; the number of high-quality prospective cohort studies is still limited. Most studies on occupational activity used crude methods for exposure assessment (i.e., job title) and a large number of women were not, or only shortly, engaged in paid employment. This may have resulted in errors in the measurement of physical activity and consequently risk estimation for risk of endometrial cancer. Several issues have not receiver sufficient attention in the epidemiologic studies thus

far. Some studies have used very rough assessments of physical activity, without specifically taking into account the frequency, duration, and intensity of physical activities, and the different periods in life during which activity patterns may have changed. In addition, the association of physical activity and premenopausal endometrial cancer risk has been insufficiently studied. Future epidemiologic studies will need to address these issues to specify the association between physical activity and endometrial cancer risk.

e:Serious risk of inconsistency; We assessed statistical heterogeneity across studies using a formal test and found statistical evidence for heterogeneity for total, leisure time, and occupational activities combined, both in cohort and case-control studies.

f: Rated down for imprecision because no meta-analysis was conducted, and because of conflicting results.

g: Serious; A further potential limitation is that a determination of the precise nature of the association between physical activity and endometrial cancer may have been hampered by the heterogeneous measures of physical activity and associated misclassification of the exposure across studies.

h:Certainty is downgraded from high to low because of serious risk of bias and serious inconsistency and imprecision and publication bias

i: Certainty is downgraded from high to low because of serious risk of bias and serious inconsistency and imprecision and publication bias

j: Certainty is downgraded from high to moderate because of serious risk of bias

3.5     Lymphoma (Hodgkin and non-Hodgkin)

**Population:** Adults (aged 18-64 years)  
**Exposure:** Duration, frequency and/or intensity of OPA, or a compositional score reflecting total volume of OPA.  
**Comparison:** No OPA, or a lesser duration, frequency and/or intensity, no or a smaller compositional score of total volume of OPA.  
**Outcome:** Lymphoma (Hodgkin and non-Hodgkin).

| Certainty assessment                                                          |                            |                      |               |              |                                  |                      | Summary of findings                                                                                                                                                                                                                                                                                                                                                                                       | Certainty             | Importance |
|-------------------------------------------------------------------------------|----------------------------|----------------------|---------------|--------------|----------------------------------|----------------------|-----------------------------------------------------------------------------------------------------------------------------------------------------------------------------------------------------------------------------------------------------------------------------------------------------------------------------------------------------------------------------------------------------------|-----------------------|------------|
| No of studies                                                                 | Study design               | Risk of bias         | Inconsistency | Indirectness | Imprecision                      | Other considerations |                                                                                                                                                                                                                                                                                                                                                                                                           |                       |            |
| Physical Activity and Risk of Lymphoma: A Meta-Analysis (Vermaete, 2013) (16) |                            |                      |               |              |                                  |                      |                                                                                                                                                                                                                                                                                                                                                                                                           |                       |            |
| 5 <sup>a</sup>                                                                | 4 case control<br>1 cohort | Serious <sup>b</sup> | Not serious   | Not serious  | Serious imprecision <sup>c</sup> | Publication bias.    | This review compared the highest vs the lowest PA level<br><b>OPA:</b><br>The meta analysis showed no significant relationship between OPA (fixed effects model) and the risk of lymphoma (OR= 0.98; 95% CI: 0.80– 1.21;)<br><br><b>LTPA:</b><br>The random effects meta-analysis showed no significant relationship between recreational PA on the risk of lymphoma (pooled OR = 0.86; 95% CI 0.73–1.02) | Very low <sup>d</sup> | Critically |

a: Brownson 1991; Zahm 1999; Cerhen 2005; Parent 2011; Van Velthoven 2010.

b: Serious: The level of evidence generated by case control studies is considerably less than that by prospective cohort studies, according to the Centre for Evidence-Based Medicine. Some studies were of low quality, especially regarding the assessment of physical activity. Remarkable differences were found in the definitions of the "highest activity level." For example, in the study of Van Veldhoven and colleagues, the highest activity level was defined as 45.74 MET-hours/week or more, whereas the highest activity level was defined as 17.5 MET-hours/week or more in 2 other studies.

c: Rated down for imprecision because of the 95% CI overlap of no effect (i.e. CI included RR of 1.0)

d: Certainty downgraded from high to low because of serious risk of bias and serious imprecision and publication bias

### 3.6 Gastric cancer

**Population:** Adults (aged 18-64 years)

**Exposure:** Duration, frequency and/or intensity of OPA, or a compositional score reflecting total volume of OPA.

**Comparison:** No OPA, or a lesser duration, frequency and/or intensity, no or a smaller compositional score of total volume of OPA.

**Outcome:** Gastric cancer

| Certainty assessment                                                                                                          |                            |                           |                      |              |                      |                      | Summary of findings                                                                                                                                                                                                                                                                                                                                                                                                                                                                                                                                                        | Certainty             | Importance |
|-------------------------------------------------------------------------------------------------------------------------------|----------------------------|---------------------------|----------------------|--------------|----------------------|----------------------|----------------------------------------------------------------------------------------------------------------------------------------------------------------------------------------------------------------------------------------------------------------------------------------------------------------------------------------------------------------------------------------------------------------------------------------------------------------------------------------------------------------------------------------------------------------------------|-----------------------|------------|
| No of studies                                                                                                                 | Study design               | Risk of bias              | Inconsistency        | Indirectness | Imprecision          | Other considerations |                                                                                                                                                                                                                                                                                                                                                                                                                                                                                                                                                                            |                       |            |
| Physical activity is associated with reduced risk of gastric cancer: A systematic review and meta-analysis (Singh 2014). (17) |                            |                           |                      |              |                      |                      |                                                                                                                                                                                                                                                                                                                                                                                                                                                                                                                                                                            |                       |            |
| 6 <sup>a</sup>                                                                                                                | 2 cohort<br>4 Case-control | Serious <sup>f</sup>      | Serious <sup>g</sup> | Not serious  | Serious <sup>n</sup> | publication bias     | This review compared the most physically active people vs. the least physically active people<br><br><b>OPA:</b><br>An not significant inverse relationship between OPA and gastric cancer risk was found (OR =0.90; 95% CI; 0.69–1.18)<br><br><b>LTPA:</b><br>A significant inverse relationship between LTPA and gastric cancer risk was found (OR=0.82; 95% CI; 0.72-0.94)                                                                                                                                                                                              | Very Low <sup>p</sup> | Critically |
| Physical Activity and Gastric Cancer Risk: A Systematic Review and Meta-Analysis (Psaltopoulou 2016) (18)                     |                            |                           |                      |              |                      |                      |                                                                                                                                                                                                                                                                                                                                                                                                                                                                                                                                                                            |                       |            |
| 2 <sup>b</sup>                                                                                                                | Cohort studies             | Very serious <sup>h</sup> | Serious <sup>i</sup> | Not serious  | Serious <sup>n</sup> | Publication bias     | This review compared the highest level of PA vs. those at the lowest level<br><br><b>OPA:</b><br>A not significant inverse relationship between OPA and gastric cancer was found. Combined cohort and case control effect estimates were (RR=0.89, 95% CI; 0.62-1.27).<br><br>OPA and gastric cancer; (RR=1.25, 95% CI; 0.67-2.33) (2 cohort studies)<br><br><b>LTPA:</b><br>LTPA showed a total not significant effect of (RR=0.88, 95% CI; 0.76-1.02) (Cohort and case control combined)<br><br>LTPA and gastric cancer: (RR=0.92, 95% CI; 0.74-1.15) (7 cohort studies) | Very Low <sup>q</sup> | Critically |
| 3 <sup>c</sup>                                                                                                                | Case control               | Very serious <sup>h</sup> | Serious <sup>i</sup> | Not serious  | Not serious          | Publication bias     | <b>OPA:</b><br>OPA and gastric cancer; (RR=0.72, 95% CI; 0.55-0.93)<br><br><b>LTPA:</b><br>LTPA and gastric cancer: (RR=0.86; 95% CI; 0.69-1.07) 9 case control)                                                                                                                                                                                                                                                                                                                                                                                                           | Very low <sup>r</sup> | Critically |

Physical Activity and Risks of Esophageal and Gastric Cancers: A Meta-Analysis (Chen, 2014) (19)

|                |                                    |                      |             |             |             |                               |                                                                                                                                                                                                                                                                                                                                                                             |                  |            |
|----------------|------------------------------------|----------------------|-------------|-------------|-------------|-------------------------------|-----------------------------------------------------------------------------------------------------------------------------------------------------------------------------------------------------------------------------------------------------------------------------------------------------------------------------------------------------------------------------|------------------|------------|
| 6 <sup>d</sup> | 3 cohort studies<br>3 case-control | Serious <sup>j</sup> | Not serious | Not serious | Not serious | Publication bias <sup>o</sup> | This review compared the highest vs the lowest categories of PA.<br><br><b>OPA:</b><br>Studies investigating the effects of OPA showed a significant effect (RR=0.79, 95% CI; 0.65-0.95) indicating a inverse relationship with gastric cancer.<br><br><b>LTPA:</b><br>LTPA (RR=0.89, 95% CI ; 0.74-1.06) was also inversely related with gastric cancer (not significant). | Low <sup>s</sup> | Critically |
|----------------|------------------------------------|----------------------|-------------|-------------|-------------|-------------------------------|-----------------------------------------------------------------------------------------------------------------------------------------------------------------------------------------------------------------------------------------------------------------------------------------------------------------------------------------------------------------------------|------------------|------------|

The association between physical activity and gastroesophageal cancer: systematic review and meta-analysis (Behrens, 2014) (20)

|                |                            |                      |                      |             |                      |                  |                                                                                                                                                                                                                                                                                                                                             |                       |            |
|----------------|----------------------------|----------------------|----------------------|-------------|----------------------|------------------|---------------------------------------------------------------------------------------------------------------------------------------------------------------------------------------------------------------------------------------------------------------------------------------------------------------------------------------------|-----------------------|------------|
| 7 <sup>e</sup> | 4 cohort<br>3 case control | Serious <sup>l</sup> | Serious <sup>m</sup> | Not serious | Serious <sup>n</sup> | Publication bias | This review compared the highest versus lowest PA<br><br><b>OPA:</b><br>High levels of OPA statistically non-significant inverse relations to gastric cancer (RR=0.84, 95% CI; 0.70-1.02)<br><br><b>LTPA:</b><br>High levels of LTPA showed statistically significant inverse relationship with gastric cancer (RR=0.80, 95% CI; 0.73-0.89) | Very low <sup>t</sup> | Critically |
|----------------|----------------------------|----------------------|----------------------|-------------|----------------------|------------------|---------------------------------------------------------------------------------------------------------------------------------------------------------------------------------------------------------------------------------------------------------------------------------------------------------------------------------------------|-----------------------|------------|

a: Cohort studies; Huerta 2010; Severson 1989. Case-Control studies; Brownson 1991; Dosemeci 1993; Vigen 2006; Parent; 2011

b: Huerta 2010; Severson 1989.

c: Parent 2011; Suwanrungruang 2008 ; Vigen 2006

d: Cohort; Huerta 2010; Severson 1989; Brownson 1991. Case control; Dosemeci 1993; Parent 2011; Suwanrungruang 2008.

e: Huerta 2010; Severson 1989; Brownson 1991; Dosemeci 1993; Parent 2011; Suwanrungruang 2008; Vigen 2006

f: Serious; Despite adjusting for numerous covariates, it is not possible to eliminate the potential of residual confounding. Socioeconomic status interacts with both exposure (level of physical activity) and outcome (risk of gastric cancer, through H. pylori infection), and may have contributed to unmeasured confounding

g: Serious: This heterogeneity could be related to methodologic differences on the measurement of physical activity on the individual studies.

h: Very serious; self-reporting regarding the ascertainment of exposure prevailed not only in case– control but also in cohort studies; therefore, methodological differences may be responsible for the heterogeneity reported in our meta-analysis/ Adjustment for meaningful confounders, such as socioeconomic status, outdoor activities, and H. pylori infection, which was referred only in one study was not present in most studies. Only three studies included in this analyses

i: Serious because of a High heterogeneity

j: Serious; Potential confounding factors were not adjusted for in the included studies

k: Serious; High heterogeneity

l: Serious; a potential limitation of the present meta-analysis. That a causal relation for the observed inverse association between physical activity and gastroesophageal cancer could not be established because no intervention study was available for inclusion.

m: Serious; There is no test for heterogeneity for occupational activity.

n: Rated down for imprecision because of the 95% CI overlap of no effect (i.e. CI included RR of 1.0)

o: There was some evidence of publication bias in the primary meta-analysis. Visual inspection of the funnel plots revealed a small degree of asymmetry

p: Rated from high to very low because of serious risk of bias, serious inconsistency and serious imprecision

q: Rated from high to very low because of serious risk of bias, serious inconsistency and serious imprecision

r: Rated from high to very low because of very serious risk of bias and serious inconsistency

s: Rated from high to low because of serious risk of bias and possible serious publication bias.  
t: Rated from high to very low because of serious risk of bias, serious inconsistency and serious imprecision

3.7 Oesophageal cancer

**Population:** Adults (aged 18-64 years)  
**Exposure:** Duration, frequency and/or intensity of OPA, or a compositional score reflecting total volume of OPA.  
**Comparison:** No OPA, or a lesser duration, frequency and/or intensity, no or a smaller compositional score of total volume of OPA.  
**Outcome:** Oesophageal cancer

| Certainty assessment |              |              |               |              |             |                      | Summary of findings | Certainty | Importance |
|----------------------|--------------|--------------|---------------|--------------|-------------|----------------------|---------------------|-----------|------------|
| No of studies        | Study design | Risk of bias | Inconsistency | Indirectness | Imprecision | Other considerations |                     |           |            |

Physical Activity and Risks of Esophageal and Gastric Cancers: A Meta-Analysis (Chen, 2014) (19)

The relation between OPA and EC could not be conducted because of considerable heterogeneity, so no combined risk estimate was obtained. This may have been because of the small number of studies were evaluated here.

The association between physical activity and gastroesophageal cancer: systematic review and meta-analysis (Behrens, 2014) (20)

|                |                            |                      |                      |             |                      |                  |                                                                                                                                                                                                                                                                                                                                                            |                       |            |
|----------------|----------------------------|----------------------|----------------------|-------------|----------------------|------------------|------------------------------------------------------------------------------------------------------------------------------------------------------------------------------------------------------------------------------------------------------------------------------------------------------------------------------------------------------------|-----------------------|------------|
| 6 <sup>a</sup> | 4 cohort<br>2 Case control | Serious <sup>b</sup> | Serious <sup>c</sup> | Not serious | Serious <sup>d</sup> | Publication bias | This review was comparing highest versus lowest PA level.<br><br><b>OPA</b><br>No statistically significant relationship was observed between OPA and oesophageal cancer (RR=0.91, 95% CI; 0.46, 1.81)<br><br><b>LTPA:</b><br>LTPA was associated with statistically significant reduction of the risk for oesophageal cancer (RR=0.72, 95% CI; 0.63-0.83) | Very low <sup>e</sup> | Critically |
|----------------|----------------------------|----------------------|----------------------|-------------|----------------------|------------------|------------------------------------------------------------------------------------------------------------------------------------------------------------------------------------------------------------------------------------------------------------------------------------------------------------------------------------------------------------|-----------------------|------------|

a: Huerta 2010; Brownson 1991; Dar 2013; Etemadi 2012; Parent 2011; Vigen 2006.  
b: Serious; potential limitation of the present meta-analysis. That a causal relation for the observed inverse association between physical activity and gastroesophageal cancer could not be established because no intervention study was available for inclusion.  
c: Serious; There is not tested for heterogeneity for occupational activity.  
d: Rated down for imprecision because of the 95% CI overlap of no effect (i.e. CI included RR of 1.0)  
e: Certainty is downgraded from high to very low because of serious risk of bias, serious inconsistency, publication bias and serious imprecision

### 3.8 Renal cancer

**Population:** Adults (aged 18-64 years)

**Exposure:** Duration, frequency and/or intensity of OPA, or a compositional score reflecting total volume of OPA.

**Comparison:** No OPA, or a lesser duration, frequency and/or intensity, no or a smaller compositional score of total volume of OPA.

**Outcome:** Renal cancer.

| Certainty assessment |              |              |               |              |             |                      | Summary of findings | Certainty | Importance |
|----------------------|--------------|--------------|---------------|--------------|-------------|----------------------|---------------------|-----------|------------|
| No of studies        | Study design | Risk of bias | Inconsistency | Indirectness | Imprecision | Other considerations |                     |           |            |

#### The association between physical activity and renal cancer: systematic review and meta-analysis (Behrens, 2013) (21)

|                 |                                    |                      |             |             |                      |      |                                                                                                                                                                                                                                                                                                                                         |                  |            |
|-----------------|------------------------------------|----------------------|-------------|-------------|----------------------|------|-----------------------------------------------------------------------------------------------------------------------------------------------------------------------------------------------------------------------------------------------------------------------------------------------------------------------------------------|------------------|------------|
| 11 <sup>a</sup> | 6 cohort studies<br>5 case control | Serious <sup>d</sup> | Not serious | Not serious | Serious <sup>f</sup> | None | This review compared the high vs low levels of PA.<br><br><b>OPA:</b><br>The effects of OPA showed a not significant reduction in renal cancer risk (RR=0.91, 95% CI: 0.79, 1.04) I <sup>2</sup> 21%)<br><br><b>LTPA:</b><br>The effects of LTPA showed a not significant reduction in renal cancer risk (RR=0.88, 95% CI: 0.77, 1.00). | Low <sup>g</sup> | Critically |
|-----------------|------------------------------------|----------------------|-------------|-------------|----------------------|------|-----------------------------------------------------------------------------------------------------------------------------------------------------------------------------------------------------------------------------------------------------------------------------------------------------------------------------------------|------------------|------------|

#### Can habitual physical activity contribute to reducing the health burden of renal cancer? (Shephard, 2016) (22)

|                |              |                      |             |             |                      |                  |                                                                                                                                                                                                                                                                                                                                                                                       |                       |            |
|----------------|--------------|----------------------|-------------|-------------|----------------------|------------------|---------------------------------------------------------------------------------------------------------------------------------------------------------------------------------------------------------------------------------------------------------------------------------------------------------------------------------------------------------------------------------------|-----------------------|------------|
| 7 <sup>b</sup> | Cohort       | Serious <sup>e</sup> | Not serious | Not serious | Serious <sup>f</sup> | Publication bias | In 7 occupational studies, the average risk renal cancer was for physically active individuals 0.88 (No CI reported) , but omitting one study without co-variables, the risk ratio rose to 0.98 (No CI reported).<br><br>2/7 studies showed a significant decrease in relationship between OPA and the risk for renal cancer.<br>5/7 showed no significant decrease in risk reduction | Very low <sup>h</sup> | Critically |
| 7 <sup>c</sup> | Case control | Serious <sup>e</sup> | Not serious | Not serious | Serious <sup>f</sup> | publication bias | The weighted average for the occupational studies was 0.98 (No CI reported) , or 0.99 (No CI reported) when omitting 3 studies with limited co-variables;<br><br>3/7 a non-significant reduction in the risk for renal cancer<br>1/7 only stated 'no effect'<br>1/7 a non-significant increase<br>2/7 a significant decrease in the risk for renal cancer.                            | Very low <sup>i</sup> | Critically |

a: 5 Case control; Brownson 1991; Goodman 1986; Mellengaard 1995; Parent 2011; Tavani 2007. Cohort 6; Bergstrom 1999; Bergstrom 2001; Mahabir 2004; Moore 2008; Van Dijk 2004; Washio 2005.

b: Bergstrom 1991; Bergstrom 2001; Mahabir 2004; Moore 2008; Van Dijk 2004; Washio 2005.

c: Brownson 1991; Goodman 1986; Mellengaard 1995; Parent 2011; Tavani 2007

d: One limitation of this meta-analysis is the large variation in the underlying studies regarding their definitions of exposure to physical activity – ranging from 'physically very active' to '5 h of vigorous physical activity per week or more'. Similarly, the definitions of physical activity referent groups ranged from 'not physically active' to '<5 h of vigorous physical activity per week'.

e: Moreover, measurements of physical activity have often been weak, and some samples have included very few individuals who were vigorously active, either at work or in their leisure hours

f: Rated down for imprecision because of the 95% CI overlap of no effect (i.e. CI included RR of 1.0)  
g: Certainty downgraded from high to low because of serious risk of bias and serious imprecision  
h: Certainty downgraded from high to very low because of serious risk of bias and serious imprecision and publication bias  
i: Certainty downgraded from high to very low because of serious risk of bias and serious imprecision and publication bias.

### 3.9 Prostate cancer

**Population:** Adults (aged 18-64 years)

**Exposure:** Duration, frequency and/or intensity of OPA, or a compositional score reflecting total volume of OPA.

**Comparison:** No OPA, or a lesser duration, frequency and/or intensity, no or a smaller compositional score of total volume of OPA.

**Outcome:** Prostate cancer

| Certainty assessment |              |              |               |              |             |                      | Summary of findings | Certainty | Importance |
|----------------------|--------------|--------------|---------------|--------------|-------------|----------------------|---------------------|-----------|------------|
| No of studies        | Study design | Risk of bias | Inconsistency | Indirectness | Imprecision | Other considerations |                     |           |            |

#### Occupational Risk factors for prostate cancer; A meta-analyses (Krstev, 2019) (23)

This article was excluded from further analyses as it was judged to not provide an accurate summary of the available evidence. (AMSTAR2 rating)

#### Physical activity in relation to risk of prostate cancer: A systematic review and meta-analysis (Benke, 2018) (24)

|                 |                     |                      |                      |             |             |      |                                                                                                                                                                                                                                                                                                                                                                                                                                                                                                                                                                                                                                                                                                                          |                  |            |
|-----------------|---------------------|----------------------|----------------------|-------------|-------------|------|--------------------------------------------------------------------------------------------------------------------------------------------------------------------------------------------------------------------------------------------------------------------------------------------------------------------------------------------------------------------------------------------------------------------------------------------------------------------------------------------------------------------------------------------------------------------------------------------------------------------------------------------------------------------------------------------------------------------------|------------------|------------|
| 28 <sup>a</sup> | Prospective studies | Serious <sup>f</sup> | Serious <sup>g</sup> | Not serious | Not serious | none | <p>This study is comparing the highest versus the lowest level of overall PA</p> <p><b>OPA:</b><br/>A not significant inverse relationship between OPA and total PCa (prostate cancer) risk was observed (RR=0.91, 95% CI 0.82-1.01) (28 studies)</p> <p>A statistically significant inverse relationship between long-term (&gt;10 years, 13 studies) OPA and total PCa was observed (RR=0.83, 95% CI 0.71–0.98)</p> <p>Evaluated by cancer subtype, an inverse association with long term OPA was noted for nonadvanced/non-aggressive PCa (RR=0.51, 95% CI; 0.37–0.71) (2 studies)</p> <p><b>LTPA:</b><br/>The relationship between Recreational physical activity and total PCA was (RR=1.03, 95% CI; 1.00-1.06)</p> | Low <sup>m</sup> | Critically |
|-----------------|---------------------|----------------------|----------------------|-------------|-------------|------|--------------------------------------------------------------------------------------------------------------------------------------------------------------------------------------------------------------------------------------------------------------------------------------------------------------------------------------------------------------------------------------------------------------------------------------------------------------------------------------------------------------------------------------------------------------------------------------------------------------------------------------------------------------------------------------------------------------------------|------------------|------------|

#### Physical activity and prostate cancer: An updated review (Shephard, 2017) (25)

|                 |                                        |                      |                      |             |                      |                  |                                                                                                                                                                                                                                                                                                                                                                                                                                                                   |                       |            |
|-----------------|----------------------------------------|----------------------|----------------------|-------------|----------------------|------------------|-------------------------------------------------------------------------------------------------------------------------------------------------------------------------------------------------------------------------------------------------------------------------------------------------------------------------------------------------------------------------------------------------------------------------------------------------------------------|-----------------------|------------|
| 19 <sup>b</sup> | Cross sectional and prospective cohort | Serious <sup>h</sup> | Serious <sup>i</sup> | Not serious | Serious <sup>j</sup> | publication bias | <p>A total of seven analyses found no effect of OPA.</p> <p>Six analyses identified a possible trend favoring the more active workers</p> <p>Six analyses demonstrated a significantly lower risk of prostate cancer in the most active and/or the least well-educated individuals.</p>                                                                                                                                                                           | Very low <sup>n</sup> | Critically |
| 16 <sup>c</sup> | Case control studies                   | Serious <sup>h</sup> | Serious <sup>i</sup> | Not serious | Serious <sup>j</sup> | publication bias | <p>1 study found a large adverse effect, 5 studies found a statistically non-significant negative trend. These studies showed a trend to a benefit of 16-40% for those with heavy work.</p> <p>Seven studies showed a significant benefit to those with the most active employment.</p> <p>One found a large benefit. In the remaining six, benefits were larger than suggested by the cross-sectional and cohort studies (33–64% for the active categories).</p> | Very low <sup>o</sup> | Critically |

#### Does physical activity reduce the risk of prostate cancer? A systematic review and meta-analysis. (Liu 2011) (26)

|                 |              |                      |                      |             |             |      |                                                                                                                                                                                                                                                                                                                                                                                                                                                                                                                                                                                                                                                                |                       |            |
|-----------------|--------------|----------------------|----------------------|-------------|-------------|------|----------------------------------------------------------------------------------------------------------------------------------------------------------------------------------------------------------------------------------------------------------------------------------------------------------------------------------------------------------------------------------------------------------------------------------------------------------------------------------------------------------------------------------------------------------------------------------------------------------------------------------------------------------------|-----------------------|------------|
| 9 <sup>d</sup>  | Cohort       | Serious <sup>k</sup> | Not serious          | Not serious | Not serious | none | <p>This review compared the highest versus lowest level of PA</p> <p><b>OPA</b><br/>OPA was significantly related with a reduced risk of PCa (RR: 0.81; 95% CI, 0.73–0.91). (Case control+ Cohort)</p> <p>OPA in cohort studies: (RR: 0.91; 95% CI, 0.87–0.95)</p> <p>The higher quality OPA studies reported a lower reduced risk (RR: 0.86, 95%CI 0.78-0.94) than the lower quality OPA studies (RR: 0.75, 95% CI: 0.61-0.94).</p> <p><b>LTPA:</b><br/>LTPA was related with a non-significant reduced risk of PCa: (RR: 0.95; 95%CI 0.89-1.00)</p> <p>In cohort studies LTPA was related with a significantly reduced risk (RR=0.95, 95% CI: 0.89-1.00)</p> | Moderate <sup>p</sup> | Critically |
| 18 <sup>e</sup> | Case control | Serious <sup>k</sup> | Serious <sup>i</sup> | Not serious | Not serious | none | <p><b>OPA:</b><br/>OPA case-control studies showed a significantly reduced PCa risk (OR: 0.73; 95% CI, 0.62–0.87)</p> <p><b>LTPA:</b><br/>LTPA case control studies showed a reduced not significant PCA risk: (OR= 0.98, 95% CI: 0.85-1.14)</p>                                                                                                                                                                                                                                                                                                                                                                                                               | Low <sup>q</sup>      | Critically |

a: contains information of 26 prospective studies: Bairati (2000), Strom (2008), Parent (2011), Krishnadasan (2008), Lagiou (2008), Orsini (2009), Pierotti (2005), Le Marchand (1991), Thune (1994), Grotta (2015), Wiklund (2008), Lund Hameid (2006), Friedenreich (2004), Norman (2002), Villeneuve (1999), Johnsen (2009), Hrafnkelsdottir (2015), Zeegers (2005), Putnam (2000), Nilsen (2000), Sormunen (2014), Doolan (2014), Hartman (1998), Le Marchand (1991), Lacey (2001), Illic (1996), Hosseini (2010)

b: Vidardottir 2008; Hartman 1998; Johnsen 2009; Lund-Nielsen 2000; Paffenbarger 1987; Putnam 2000; Severson 1989; Zegger 2005; Albanes 1989; Grotta 2015; Harvei and Kravdal 1997; Hrafnkelsdottir 2015; Hsing 1994; Thune and Lund 1994; Norman 2002; Orsini 2009; Clarke and Whittemore 2000; Parent 2011; Vena 1987.

c: Illic 1996; Doolan 2014; Hosseini 2010; Lacey 2001; Sass-Kortak 2007; Friedenreich 2004; Lagiou 2008; Le Marchand 1991; Wiklund 2008; Bairati 2000; Brownson 1991; Dosemeci 1993; Krishnadasan 2008; Pierotti 2005; Strom 2008; Villeneuve 1999

d: Johnson (2009), Orsini (2009), Lund (2006) Zeegers (2005), Norman (2002), Lund (2000), Putnam (2000), Hartman (1998), Severson (1989)

e: Parent (2011), Mostafa (2010), Wiklund (2008), Krishnadasan (2008), Lagiou (2008) Strom (2008), Darlington (2007), Sass-Kortsak (2007), Pierotti (2005), Friedenreich (2004), Lacey (2001), Bairati (2000) , Andersonn (1996), Illic (1996), Dosemeci (1993), Brownson (1991), Le Marchand (1991) He (1988)

f: However, our findings must be interpreted with caution. First,our result on long-term OPA and total PCa incidence appeared to be affected by individual studies, rendering the previous inverse association statistically non-significant. but most long-term OPA studies used job titles to assess OPA which may have introduced some degree of misclassification in our meta-analysis.

g: Serious inconsistency due to a high inconsistency

h: Moreover, in terms of occupational activity, relatively few investigators have co-varied their findings for exposure to toxic chemicals, and often there has been an incomplete allowance for socioeconomic and dietary differences between those engaged in sedentary and physically demanding work.

i: Serious inconsistency; this is the reason why no meta-analysis is performed.

j: Serious imprecision because a meta-analysis could not be performed.

k: Measurement of OPA varied, and another potential limitation is the residual confounding factors that were not adjusted for in the included studies, which may have affected the results.

l: First, we observed some significant between-study heterogeneity across all of the included studies

m: Certainty downgraded from high to low because of serious risk of bias and inconsistency

n: Certainty downgraded from high to very low because of serious risk of bias and inconsistency and imprecision

o: Certainty downgraded from high to very low because of serious risk of bias and inconsistency and imprecision

p: Certainty downgraded from high to moderate because of serious risk of bias

q: Certainty downgraded from high to low because of serious risk of bias and inconsistency

3.10 Pancreatic cancer

**Population:** Adults (aged 18-64 years)  
**Exposure:** Duration, frequency and/or intensity of OPA, or a compositional score reflecting total volume of OPA.  
**Comparison:** No OPA, or a lesser duration, frequency and/or intensity, no or a smaller compositional score of total volume of OPA.  
**Outcome:** Pancreatic cancer

| Certainty assessment                                                                                                                            |              |                           |               |              |             |                      | Summary of findings                                                                                                                                                                                                                                                                                                                                                                                     | Certainty             | Importance |
|-------------------------------------------------------------------------------------------------------------------------------------------------|--------------|---------------------------|---------------|--------------|-------------|----------------------|---------------------------------------------------------------------------------------------------------------------------------------------------------------------------------------------------------------------------------------------------------------------------------------------------------------------------------------------------------------------------------------------------------|-----------------------|------------|
| No of studies                                                                                                                                   | Study design | Risk of bias              | Inconsistency | Indirectness | Imprecision | Other considerations |                                                                                                                                                                                                                                                                                                                                                                                                         |                       |            |
| Can physical activity modulate pancreatic cancer risk? a systematic review and meta-analysis (O’Rorke, 2010) (27)                               |              |                           |               |              |             |                      |                                                                                                                                                                                                                                                                                                                                                                                                         |                       |            |
| This article was excluded from further analyses as it was judged to not provide an accurate summary of the available evidence. (AMSTAR2 rating) |              |                           |               |              |             |                      |                                                                                                                                                                                                                                                                                                                                                                                                         |                       |            |
| Physical activity and pancreatic cancer risk: A systematic review (Bao, 2008) (28)                                                              |              |                           |               |              |             |                      |                                                                                                                                                                                                                                                                                                                                                                                                         |                       |            |
| 3 <sup>a</sup>                                                                                                                                  | Cohort       | Very serious <sup>b</sup> | Not serious   | Not serious  | Not serious | Publication bias     | <p>This review compared the highest versus the lowest category of physical activity.</p> <p><b>OPA:</b><br/>OPA was reported in three prospective studies (25, 26, 32). The individual relative risks ranged from 0.63 to 0.88, and the pooled relative risk was (RR=0.75 95% CI, 0.58-0.96)</p> <p><b>LTPA:</b><br/>LTPA was inversely related with pancreatic cancer (RR=0.94, 95% CI, 0.84-1.05)</p> | Very low <sup>c</sup> | Critically |

a: Berrington de Gonzalez 2006; Isaksson 2002; Stoltenberg-Solomon 2002  
b: In addition, the observed association could be due to unmeasured confounding. However, the confounding may exist in both directions: on one hand, individuals who have medical conditions such as diabetes are ordinarily excluded from employment as manual labourers', and on the other hand, physically demanding occupations are usually associated with harmful occupational exposures, lower social economic status, and unhealthy lifestyles such as smoking and drinking. The inverse association between occupational physical activity and pancreatic cancer should be interpreted with caution because it was based on only three studies.  
c: Certainty downgraded from high to low because of very serious risk of bias

3.11 Bladder cancer

**Population:** Adults (aged 18-64 years)  
**Exposure:** Duration, frequency and/or intensity of OPA, or a compositional score reflecting total volume of OPA.  
**Comparison:** No OPA, or a lesser duration, frequency and/or intensity, no or a smaller compositional score of total volume of OPA.  
**Outcome:** bladder cancer

| Certainty assessment |              |              |               |              |             |                      | Summary of findings | Certainty | Importance |
|----------------------|--------------|--------------|---------------|--------------|-------------|----------------------|---------------------|-----------|------------|
| No of studies        | Study design | Risk of bias | Inconsistency | Indirectness | Imprecision | Other considerations |                     |           |            |

The association between physical activity and bladder cancer: Systematic review and meta-analysis (Keimling 2014) (29)

This article was excluded from further analyses as it was judged to not provide an accurate summary of the available evidence. (AMSTAR2 rating)

4.0 Diabetes Mellitus type 2

**Population:** Adults (aged 18-64 years)  
**Exposure:** Duration, frequency and/or intensity of OPA, or a compositional score reflecting total volume of OPA.  
**Comparison:** No OPA, or a lesser duration, frequency and/or intensity, no or a smaller compositional score of total volume of OPA.  
**Outcome:** Diabetes type 2

| Certainty assessment                                                                                                     |                |                           |               |              |             |                      | Summary of findings                                                                                                                                                                                                                                                                                                                  | Certainty             | Importance |
|--------------------------------------------------------------------------------------------------------------------------|----------------|---------------------------|---------------|--------------|-------------|----------------------|--------------------------------------------------------------------------------------------------------------------------------------------------------------------------------------------------------------------------------------------------------------------------------------------------------------------------------------|-----------------------|------------|
| No of studies                                                                                                            | Study design   | Risk of bias              | Inconsistency | Indirectness | Imprecision | Other considerations |                                                                                                                                                                                                                                                                                                                                      |                       |            |
| Physical activity and the risk of type 2 diabetes: a systematic review and dose-response meta-analysis (Aune, 2015) (30) |                |                           |               |              |             |                      |                                                                                                                                                                                                                                                                                                                                      |                       |            |
| 3 <sup>a</sup>                                                                                                           | Cohort studies | Very serious <sup>a</sup> | Not serious   | Not serious  | Not serious | publication bias     | This review compared the high versus the low levels of PA.<br><br><b>OPA</b><br>A high level of OPA was significantly related with a reduced diabetes type 2 risk (RR=0.85, 95%CI 0.79-0.92).<br><br><b>LTPA:</b><br>A high level of LTPA was significantly related with a reduced diabetes type 2 risk (RR=0.74, 95% CI: 0.70-0.79) | Very low <sup>c</sup> | Critically |

a: Hu G 2003; Chien 2009; Steinbrecher 2012

b: It is possible that the observed inverse association between physical activity and risk of type 2 diabetes risk was influenced by unmeasured or residual confounding. The inverse association between occupational physical activity and type 2 diabetes cancer should be interpreted with caution because it was based on only three studies.

c: Certainty downgraded high to low because of very serious risk of bias.

5.0    Osteoarthritis

**Population:** Adults (aged 18-64 years)  
**Exposure:** Duration, frequency and/or intensity of OPA, or a compositional score reflecting total volume of OPA.  
**Comparison:** No OPA, or a lesser duration, frequency and/or intensity, no or a smaller compositional score of total volume of OPA.  
**Outcome:** Osteoarthritis

| Certainty assessment |              |              |               |              |             |                      | Summary of findings | Certainty | Importance |
|----------------------|--------------|--------------|---------------|--------------|-------------|----------------------|---------------------|-----------|------------|
| Nº of studies        | Study design | Risk of bias | Inconsistency | Indirectness | Imprecision | Other considerations |                     |           |            |

Occupational risk factors for osteoarthritis of the knee: a meta-analysis (McWilliams 2011) (31)

|                |                                                 |                      |                      |             |             |                               |                                                                                                                                                                                                                                                                                                                                                                                                           |                       |            |
|----------------|-------------------------------------------------|----------------------|----------------------|-------------|-------------|-------------------------------|-----------------------------------------------------------------------------------------------------------------------------------------------------------------------------------------------------------------------------------------------------------------------------------------------------------------------------------------------------------------------------------------------------------|-----------------------|------------|
| 8 <sup>a</sup> | 2 cohort<br>3 cross sectional<br>3 case control | Serious <sup>c</sup> | Serious <sup>d</sup> | Not serious | Not serious | Publication bias <sup>e</sup> | Heavy or manual work (546.853 subjects) was associated with knee osteoarthritis (OR=1.45, 95% CI; 1.20-1.76)<br><b>Cohort studies;</b><br>1 study non-significant increase<br>1 study non-significant decrease<br><b>Case-control;</b><br>3 study significant increase<br><b>Cross sectional;</b><br>1 study non-significant decrease<br>1 study non-significant increase<br>1 study significant increase | Very low <sup>i</sup> | Critically |
|----------------|-------------------------------------------------|----------------------|----------------------|-------------|-------------|-------------------------------|-----------------------------------------------------------------------------------------------------------------------------------------------------------------------------------------------------------------------------------------------------------------------------------------------------------------------------------------------------------------------------------------------------------|-----------------------|------------|

Men and women's occupational activities and the risk of developing osteoarthritis of the knee, hip or hands: A systematic review and recommendations for future research (Gignac, 2019) (32)

|                 |                                                 |                      |                      |             |                      |                  |                                                                                                                                                                                                                                                                                                                                                                                         |                       |            |
|-----------------|-------------------------------------------------|----------------------|----------------------|-------------|----------------------|------------------|-----------------------------------------------------------------------------------------------------------------------------------------------------------------------------------------------------------------------------------------------------------------------------------------------------------------------------------------------------------------------------------------|-----------------------|------------|
| 11 <sup>b</sup> | 6 cohort<br>2 case control<br>3 cross sectional | Serious <sup>f</sup> | Serious <sup>g</sup> | Not serious | Serious <sup>h</sup> | publication bias | Cumulative physical workloads were associated with a moderate level of evidence for an hip OA among men. Heavy physical demands yielding mixed evidence for knee OA.<br>mixed evidence for cumulative physical loads and sitting, standing and walking being associated with hip OA. Evidence was also mixed for physically demanding work related to developing OA in multiple joints. | Very low <sup>j</sup> | Critically |
|-----------------|-------------------------------------------------|----------------------|----------------------|-------------|----------------------|------------------|-----------------------------------------------------------------------------------------------------------------------------------------------------------------------------------------------------------------------------------------------------------------------------------------------------------------------------------------------------------------------------------------|-----------------------|------------|

Occupational activities and osteoarthritis of the knee (Palmer, 2012) (33)

This article was excluded from further analyses as it was judged to not provide an accurate summary of the available evidence. (AMSTAR2 rating)

a: Toivanen 2010; Kohatsu 1990; Elsner 1996; Yoshimura 2006; Riyazi 2008; Andrianakos 2006; Fernandez-Lopez 2008; Kim 2010.  
b: Ezzat 2013; Toivanen 2010; Apold 2014; Felson 1991; Karkkainen 2013; Kujala 1995; Sahlstrom 1997; Vingard 1991; Olsen 1994; Ratzlaff 2012; Rubak 2014.  
c: Early adult life is thought to be important for the development of OA, but recall of activities in the past maybe biased or inaccurate. The differences in measurement could contribute to variability, although the current job is likely to be similar to the longest-held job for many subjects.

- d: High heterogeneity has been observed (I<sup>2</sup> 80.9)
- e: There appears to be a strong likelihood of publication bias within the literature for occupation and knee OA studies.
- f: Our quality appraisal identified several constraints and limitations to study designs and measurement. Most research utilized case-control or cross-sectional designs with few longitudinal studies and no interventions. There is potential for recall bias across all methods of collecting work history, which is a limitation of most of the studies reported
- g: Serious risk of inconsistency; heterogeneity has been described.
- h: Serious risk of imprecision; No RR-OR reported, no CI reported.
- i: Certainty downgraded from high to very low because of serious risk of bias, inconsistency and publication bias
- j: Certainty downgraded from high to very low because of serious risk of bias, serious inconsistency and serious imprecision

6.0 Mental Health

**Population:** Adults (aged 18-64 years)  
**Exposure:** Duration, frequency and/or intensity of OPA, or a compositional score reflecting total volume of OPA.  
**Comparison:** No OPA, or a lesser duration, frequency and/or intensity, no or a smaller compositional score of total volume of OPA.  
**Outcome:** Mental Health

| Certainty assessment                                                                    |                                            |                      |                      |              |                      |                      | Summary of findings                                                                                                                                                                                                                            | Certainty             | Importance |
|-----------------------------------------------------------------------------------------|--------------------------------------------|----------------------|----------------------|--------------|----------------------|----------------------|------------------------------------------------------------------------------------------------------------------------------------------------------------------------------------------------------------------------------------------------|-----------------------|------------|
| No of studies                                                                           | Study design                               | Risk of bias         | Inconsistency        | Indirectness | Imprecision          | Other considerations |                                                                                                                                                                                                                                                |                       |            |
| Domain-Specific Physical Activity and Mental Health: A Meta-analysis (White, 2017) (34) |                                            |                      |                      |              |                      |                      |                                                                                                                                                                                                                                                |                       |            |
| 8 <sup>a</sup>                                                                          | 7 cross sectional<br>1 cohort <sup>b</sup> | Serious <sup>c</sup> | Serious <sup>d</sup> | Not serious  | Serious <sup>e</sup> | Publication bias     | <b>OPA:</b><br>work-related PA had a weak positive relationship with mental ill-health among adults (r=0.10, 95% CI: 0.04-0.16)<br><br><b>LTPA:</b><br>LTPA had a negative relationship with mental ill-health (r=-0.11, 95% CI; -0.16- -0.06) | Very low <sup>f</sup> | Critically |
| 5 <sup>a</sup>                                                                          | 5 cross sectional                          | Serious              | Serious              | Not serious  | Serious <sup>e</sup> | Publication bias     | <b>OPA:</b><br>Work-related PA had a weak positive relationship with mental health among adults (r=0.02, 95% CI; -0.09-0.12)<br><br><b>LTPA:</b><br>LTPA had a positive relationship with mental health (r=0.13, 95% CI; 0.08-0.18)            | Very low              | Critically |

a: Bogaert 2014, Cerin 2009, Im 2014, Jurakic 2010; Kull 2012; Lin 2008; McKercher 2013; Mutric 2007; Pedisic 2015; Purakom 2013; Teychenne 2008; Teychenne 2010; Humpreys 2013.

b: 9 studies investigated the relation between Work-PA and Mental-ill Health, 5 studies were investigated on the relation between Work related-PA and Mental Health.

c: Self-determined motivation may also explain some of adolescents / Mostly, 98% of the included studies were observational, the majority of which were cross-sectional. As cross-sectional studies cannot infer causality, the study designs of the included studies are a limitation

d: Although work-related PA was positively associated with mental health there was a significant high heterogeneity

e: Serious imprecision since r crosses 0.0.

f: Certainty downgraded from high to very low because of serious risk of bias and serious inconsistency and serious imprecision.

7.0 Sleep quality and/or duration

**Population:** Adults (aged 18-64 years)  
**Exposure:** Duration, frequency and/or intensity of OPA, or a compositional score reflecting total volume of OPA.  
**Comparison:** No OPA, or a lesser duration, frequency and/or intensity, no or a smaller compositional score of total volume of OPA.  
**Outcome:** Sleep quality/and or duration

| Certainty assessment                                                           |                                    |                      |                      |              |                      |                                        | Summary of findings                                                                                                                                                                                                                                                                             | Certainty             | Importance |
|--------------------------------------------------------------------------------|------------------------------------|----------------------|----------------------|--------------|----------------------|----------------------------------------|-------------------------------------------------------------------------------------------------------------------------------------------------------------------------------------------------------------------------------------------------------------------------------------------------|-----------------------|------------|
| No of studies                                                                  | Study design                       | Risk of bias         | Inconsistency        | Indirectness | Imprecision          | Other considerations                   |                                                                                                                                                                                                                                                                                                 |                       |            |
| Association between insomnia and job stress: a meta-analysis (Yang, 2018) (35) |                                    |                      |                      |              |                      |                                        |                                                                                                                                                                                                                                                                                                 |                       |            |
| 7 <sup>a</sup>                                                                 | 4 cross sectional<br>3 prospective | Serious <sup>b</sup> | Serious <sup>c</sup> | Not serious  | Serious <sup>d</sup> | Strong association<br>Publication bias | <b>OPA:</b><br>The odds ratio for the relationship between heavy workload was and insomnia (OR= 2.76; 95%CI: 1.71-4.45) suggesting that a higher workload is related to and increased risk of insomnia symptoms in this populations<br><br><b>LTPA:</b><br>LTPA was not assessed in this study. | Very low <sup>e</sup> | Important  |

a: Tachibana 1998; Akerstedt 2002; Linton 2004; Ota A 2005; Ota A 2009; Akerstedt 2012; Yoshioka 2013.

b: We considered that measurements made with those questionnaires did not provide such good quality as the standard scales, which may enhance the risk of bias.

c: High heterogeneity

d: Serious imprecision due to the broad confidence intervals.

e: Certainty downgraded from high to very low because of serious risk of bias, inconsistency and imprecision. Certainty upgraded from very low to low because of a strong association (RR >2.0). Downgraded from low to very low because of publication bias.

8.0 Hypertension

**Population:** Adults (aged 18-64 years)  
**Exposure:** Duration, frequency and/or intensity of OPA, or a compositional score reflecting total volume of OPA.  
**Comparison:** No OPA, or a lesser duration, frequency and/or intensity, no or a smaller compositional score of total volume of OPA.  
**Outcome:** Hypertension

| Certainty assessment                                                                                       |                |                      |                      |              |                      |                      | Summary of findings                                                                                                                                                                                                                                                                                                                                                                                                                                                                                                                                                                                                                                                                                                                                                    | Certainty             | Importance |
|------------------------------------------------------------------------------------------------------------|----------------|----------------------|----------------------|--------------|----------------------|----------------------|------------------------------------------------------------------------------------------------------------------------------------------------------------------------------------------------------------------------------------------------------------------------------------------------------------------------------------------------------------------------------------------------------------------------------------------------------------------------------------------------------------------------------------------------------------------------------------------------------------------------------------------------------------------------------------------------------------------------------------------------------------------------|-----------------------|------------|
| No of studies                                                                                              | Study design   | Risk of bias         | Inconsistency        | Indirectness | Imprecision          | Other considerations |                                                                                                                                                                                                                                                                                                                                                                                                                                                                                                                                                                                                                                                                                                                                                                        |                       |            |
| Physical Activity and Risk of Hypertension A Meta-Analysis of Prospective Cohort Studies (Huai, 2013) (36) |                |                      |                      |              |                      |                      |                                                                                                                                                                                                                                                                                                                                                                                                                                                                                                                                                                                                                                                                                                                                                                        |                       |            |
| 6 <sup>a</sup>                                                                                             | Cohort studies | Serious <sup>b</sup> | Serious <sup>c</sup> | Not serious  | Serious <sup>d</sup> | none                 | <p>In this study the lowest category was defined as low-level PA (reference group), the highest category as high-level PA, all categories in between were pooled to represent moderate-level PA</p> <p><b>OPA:</b><br/>The pooled result showed that the relationship between high-level OPA and risk of hypertension was statistically not significant (RR, 0.93; 95% CI, 0.81–1.08).</p> <p>Result showed that the relationship between moderate-level OPA and risk of hypertension was not significant (RR, 0.96; 95% CI, 0.87–1.06).</p> <p><b>LTPA:</b><br/>The overall result showed that high-level LTPA was related with a significant decreased risk of hypertension compared with the reference group with low-level LTPA (RR, 0.81; 95% CI, 0.76–0.85).</p> | Very low <sup>e</sup> | Important  |

a: Camoes 2020; Pouliou 2012; Gu 2007; Barengo 2005; Pereira 1999; Juntunen 2003.  
b: In addition, the association between RPA and decreased risk of hypertension in this meta-analysis might be confounded by various factors. Second, because of the inability to obtain raw data, we could perform only a study-level but not a patient-level meta-analysis, which would have enabled us to adjust for multiple factors  
c: heterogeneity was I<sup>2</sup>: 66,3%.  
d: Rated down for imprecision because of the 95% CI overlap of no effect (i.e. CI included RR of 1.0)  
e: Certainty is downgraded from high to very low because of serious risk of bias, serious inconsistency and imprecision.

Abbreviations

|      |                                |
|------|--------------------------------|
| PA   | Physical Activity              |
| OPA  | Occupational Physical Activity |
| LTPA | Leisure Time Physical Acitvity |
| RR   | Risk Ratio                     |
| CI   | Confidence interval            |
| HR   | Hazard Ratio                   |
| CHD  | Coronary Heart Disease         |
| MET  | Metabolic equivalent of task   |
| OR   | Odds Ratio                     |
| OA   | Osteoarthritis                 |
| ORR  | Overall Relative Risk          |

## References

1. Samitz G, Egger M, Zwahlen M. Domains of physical activity and all-cause mortality: systematic review and dose-response meta-analysis of cohort studies. *International journal of epidemiology*. 2011;40(5):1382-400.
2. Coenen P, Huysmans MA, Holtermann A, Krause N, van Mechelen W, Straker LM, et al. Do highly physically active workers die early? A systematic review with meta-analysis of data from 193 696 participants. *British journal of sports medicine*. 2018;52(20):1320-6.
3. Wendel-Vos GC, Schuit AJ, Feskens EJ, Boshuizen HC, Verschuren WM, Saris WH, et al. Physical activity and stroke. A meta-analysis of observational data. *International journal of epidemiology*. 2004;33(4):787-98.
4. Li J, Loerbroeks A, Angerer P. Physical activity and risk of cardiovascular disease: what does the new epidemiological evidence show? *Current opinion in cardiology*. 2013;28(5):575-83.
5. Sattelmair J, Pertman J, Ding EL, Kohl HW, 3rd, Haskell W, Lee IM. Dose response between physical activity and risk of coronary heart disease: a meta-analysis. *Circulation*. 2011;124(7):789-95.
6. Wolin KY, Yan Y, Colditz GA, Lee IM. Physical activity and colon cancer prevention: a meta-analysis. *British journal of cancer*. 2009;100(4):611-6.
7. Mahmood S, MacInnis RJ, English DR, Karahalios A, Lynch BM. Domain-specific physical activity and sedentary behaviour in relation to colon and rectal cancer risk: a systematic review and meta-analysis. *International journal of epidemiology*. 2017;46(6):1797-813.
8. Boyle T, Keegel T, Bull F, Heyworth J, Fritschi L. Physical activity and the risk of proximal colon and distal colon cancers: A systematic review and meta-analysis. 2012;15:S332-S3.
9. Samad AK, Taylor RS, Marshall T, Chapman MA. A meta-analysis of the association of physical activity with reduced risk of colorectal cancer. *Colorectal disease : the official journal of the Association of Coloproctology of Great Britain and Ireland*. 2005;7(3):204-13.
10. Robsahm TE, Aagnes B, Hjartaker A, Langseth H, Bray FI, Larsen IK. Body mass index, physical activity, and colorectal cancer by anatomical subsites: a systematic review and meta-analysis of cohort studies. 2013;22(6):492-505.
11. Wu Y, Zhang D, Kang S. Physical activity and risk of breast cancer: a meta-analysis of prospective studies. *Breast cancer research and treatment*. 2013;137(3):869-82.
12. Pizot C, Boniol M, Mullie P, Koechlin A, Boniol M, Boyle P, et al. Physical activity, hormone replacement therapy and breast cancer risk: A meta-analysis of prospective studies. 2016;52:138-54.
13. Chen X, Wang Q, Zhang Y, Xie Q, Tan X. Physical Activity and Risk of Breast Cancer: A Meta-Analysis of 38 Cohort Studies in 45 Study Reports. *Value in health : the journal of the International Society for Pharmacoeconomics and Outcomes Research*. 2019;22(1):104-28.
14. Voskuil DW, Monninkhof EM, Elias SG, Vlems FA, van Leeuwen FE. Physical activity and endometrial cancer risk, a systematic review of current evidence. *Cancer epidemiology, biomarkers & prevention : a publication of the American Association for Cancer Research, cosponsored by the American Society of Preventive Oncology*. 2007;16(4):639-48.
15. Schmid D, Behrens G, Keimling M, Jochem C, Ricci C, Leitzmann M. A systematic review and meta-analysis of physical activity and endometrial cancer risk. *European journal of epidemiology*. 2015;30(5):397-412.
16. Vermaete NV, Wolter P, Verhoef GE, Kollen BJ, Kwakkel G, Schepers L, et al. Physical activity and risk of lymphoma: a meta-analysis. *Cancer epidemiology, biomarkers & prevention : a publication of the American Association for Cancer Research, cosponsored by the American Society of Preventive Oncology*. 2013;22(7):1173-84.
17. Singh S, Edakkanambeth Varayil J, Devanna S, Murad MH, Iyer PG. Physical activity is associated with reduced risk of gastric cancer: a systematic review and meta-analysis. *Cancer prevention research (Philadelphia, Pa)*. 2014;7(1):12-22.
18. Psaltopoulou T, Ntanas-Stathopoulos I, Tzanninis I-G, Kantzanou M, Georgiadou D, Sergeantanis TN. Physical Activity and Gastric Cancer Risk: A Systematic Review and Meta-Analysis. 2016;26(6):445-64.

19. Chen Y, Yu C, Li Y. Physical activity and risks of esophageal and gastric cancers: a meta-analysis. 2014;9(2):e88082.
20. Behrens G, Jochem C, Keimling M, Ricci C, Schmid D, Leitzmann MF. The association between physical activity and gastroesophageal cancer: systematic review and meta-analysis. 2014;29(3):151-70.
21. Behrens G, Leitzmann MF. The association between physical activity and renal cancer: systematic review and meta-analysis. *British journal of cancer*. 2013;108(4):798-811.
22. Shephard RJ. Can habitual physical activity contribute to reducing the health burden of renal cancer? 2016;28(2):148-63.
23. Krstev S, Knutsson A. Occupational Risk Factors for Prostate Cancer: A Meta-analysis. *Journal of cancer prevention*. 2019;24(2):91-111.
24. Benke IN, Leitzmann MF, Behrens G, Schmid D. Physical activity in relation to risk of prostate cancer: a systematic review and meta-analysis. *Annals of oncology : official journal of the European Society for Medical Oncology*. 2018;29(5):1154-79.
25. Shephard R. Physical Activity and Prostate Cancer: An Updated Review. 2017;47(6):1055-73.
26. Liu Y, Hu F, Li D, Wang F, Zhu L, Chen W, et al. Does physical activity reduce the risk of prostate cancer? A systematic review and meta-analysis. *European urology*. 2011;60(5):1029-44.
27. O'Rourke MA, Cantwell MM, Cardwell CR, Mulholland HG, Murray LJ. Can physical activity modulate pancreatic cancer risk? a systematic review and meta-analysis. *International journal of cancer*. 2010;126(12):2957-68.
28. Bao Y, Michaud DS. Physical activity and pancreatic cancer risk: a systematic review. *Cancer epidemiology, biomarkers & prevention : a publication of the American Association for Cancer Research, cosponsored by the American Society of Preventive Oncology*. 2008;17(10):2671-82.
29. Keimling M, Behrens G, Schmid D, Jochem C, Leitzmann MF. The association between physical activity and bladder cancer: systematic review and meta-analysis. *British journal of cancer*. 2014;110(7):1862-70.
30. Aune D, Norat T, Leitzmann M, Tonstad S, Vatten LJ. Physical activity and the risk of type 2 diabetes: a systematic review and dose-response meta-analysis. *European journal of epidemiology*. 2015;30(7):529-42.
31. McWilliams DF, Leeb BF, Muthuri SG, Doherty M, Zhang W. Occupational risk factors for osteoarthritis of the knee: a meta-analysis. *Osteoarthritis and cartilage*. 2011;19(7):829-39.
32. Gignac MAM, Irvin E, Cullen K, Van Eerd D, Beaton DE, Mahood Q, et al. Men and women's occupational activities and the risk of developing osteoarthritis of the knee, hip or hands: A systematic review and recommendations for future research. *Arthritis care & research*. 2019.
33. Palmer KT. Occupational activities and osteoarthritis of the knee. 2012;102(1):147-70.
34. White RL, Babic MJ, Parker PD, Lubans DR, Astell-Burt T, Lonsdale C. Domain-Specific Physical Activity and Mental Health: A Meta-analysis. *American journal of preventive medicine*. 2017;52(5):653-66.
35. Yang B, Wang Y, Cui F, Huang T, Sheng P, Shi T, et al. Association between insomnia and job stress: a meta-analysis. *Sleep & breathing = Schlaf & Atmung*. 2018;22(4):1221-31.
36. Huai P, Xun H, Reilly KH, Wang Y, Ma W, Xi B. Physical Activity and Risk of Hypertension A Meta-Analysis of Prospective Cohort Studies. 2013;62(6):1021-6.
