# Supplementary material for: How does occupational physical activity influence health? An umbrella review of 23 health outcomes across 158 observational studies
Source: HighWire-hosted journal article supplement (doi:10.1136/bjsports-2020-102587), 2020-11-25

## Supplementary material 7: Assessing heterogeneity

## Forest plot oesophageal cancer:

Behrens 2014: The association between physical activity and gastroesophageal cancer: systematic review and meta-analysis

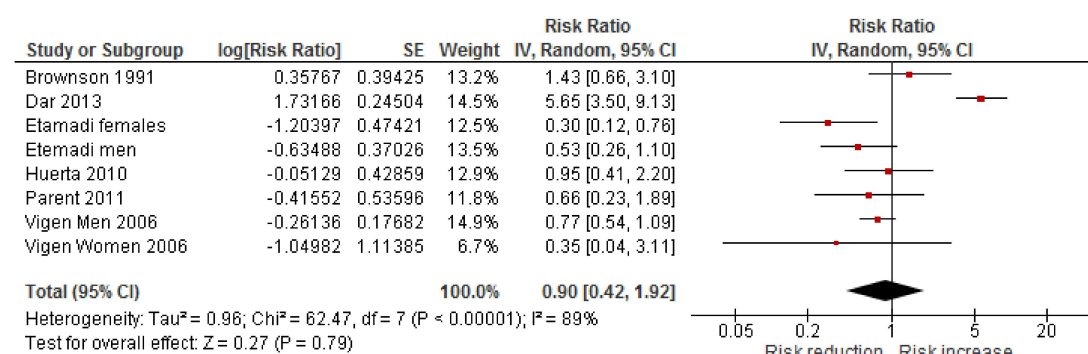

## Forest plot Endometrial cancer.

Schmid 2015: A systematic review and meta-analysis of physical activity and endometrial cancer risk

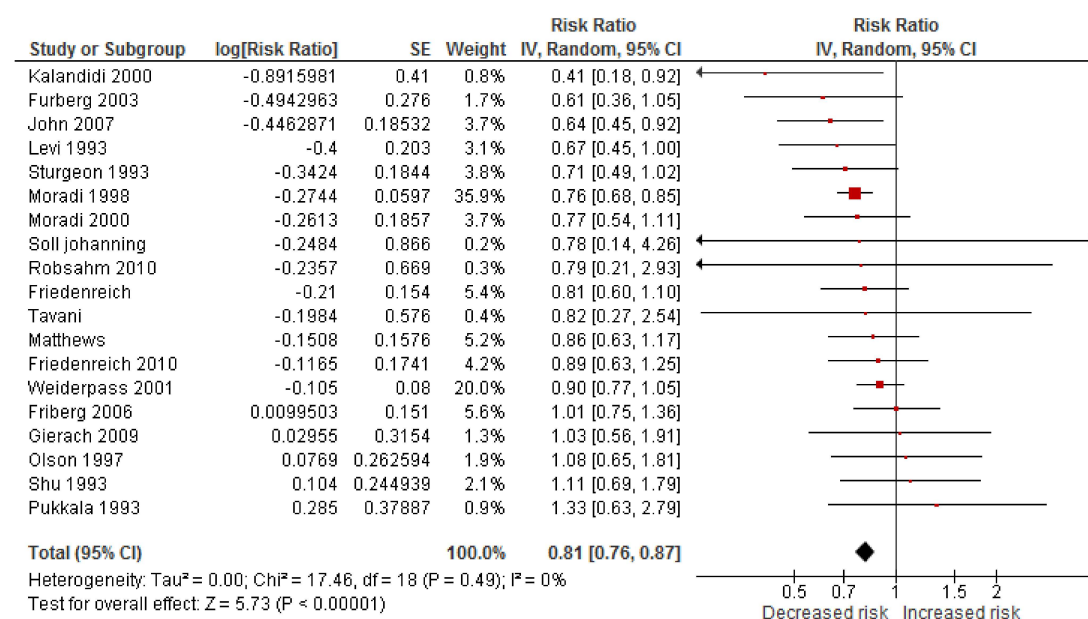

Supplement: bjsports-2020-102587supp007_data_supplement.pdf [file bjsports-2020-102587supp007_data_supplement.pdf]
