# Supplementary material for: How does occupational physical activity influence health? An umbrella review of 23 health outcomes across 158 observational studies
Source: HighWire-hosted journal article supplement (doi:10.1136/bjsports-2020-102587), 2020-11-25

## Supplementary material 8: Test for publication bias.

**Colon cancer:**

Mahmood 2017: Domain-specific physical activity and sedentary behaviour in relation to colon and rectal cancer risk: A systematic review and meta-analysis

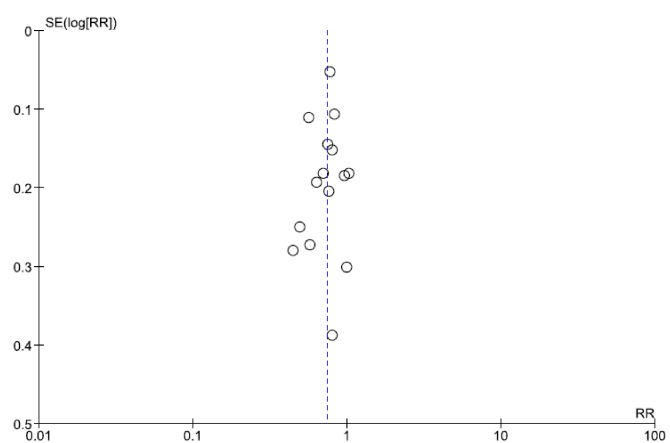**Rectal:**

Mahmood 2017: Domain-specific physical activity and sedentary behaviour in relation to colon and rectal cancer risk: A systematic review and meta-analysis

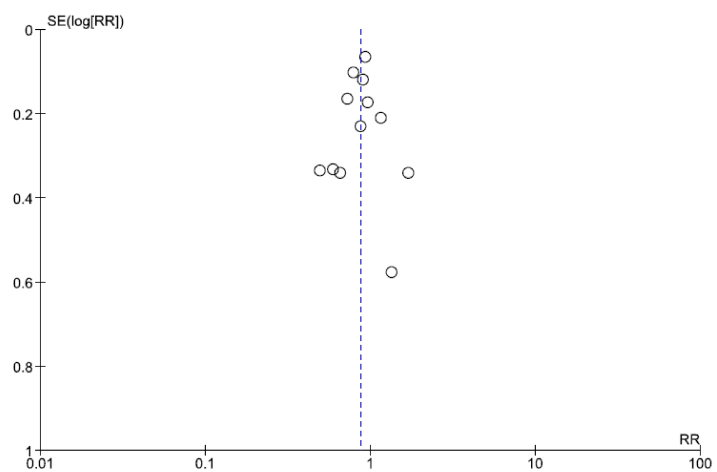

**Endometrial cancer:**

Schmid 2015: A systematic review and meta-analysis of physical activity and endometrial cancer risk

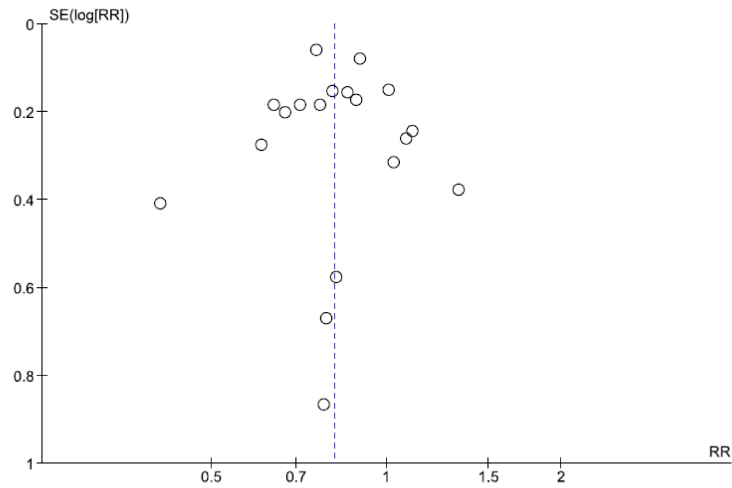**Renal cancer:**

Behrens 2013: The association between physical activity and renal cancer: systematic review and meta-analysis

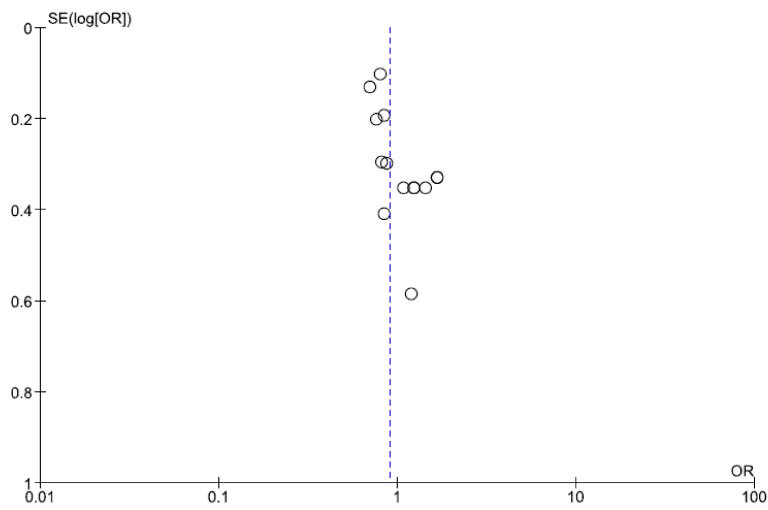

Supplement: bjsports-2020-102587supp008_data_supplement.pdf [file bjsports-2020-102587supp008_data_supplement.pdf]
